# Supplementary material for: Photosynthesis and respiration of the soft coral Xenia umbellata respond to warming but not to organic carbon eutrophication
Source: PeerJ. 2021 Jul 27;9:e11663. doi: 10.7717/peerj.11663 (PMC8323596; doi:10.7717/peerj.11663)
Supplement: Supplemental Information 1 [file peerj-09-11663-s001.xlsx]

## Sheet: Sheet1
row	date	day	treatment	temperature	salinity	tank_ID	colony	jar	polyps	Sd_Oxygen	Ed_Sl_Oxygen	El_Oxygen	Sd_time	Sl_time	El_time	Time Sd_Ed_Sl	Time Ed_Sl_El	Mins_Time Sd_Ed_Sl	Mins_Time Ed_Sl_El
1	23.04.19	-1	Control	26	35.5	1	6	1	14	8.05	6.97	8.32	10:27:00	12:36:00	14:35:00	02:09:00	01:59:00	2:09:00	1:59:00
3	23.04.19	-1	Control	26	35.5	1	NA	C1	NA	7.87	7.67	7.91	10:28:00	12:37:00	14:37:00	02:09:00	02:00:00	2:09:00	2:00:00
5	23.04.19	-1	Medium	26	35.8	2	7	2	16	7.86	6.41	8.09	10:34:00	12:44:00	14:39:00	02:10:00	01:55:00	2:10:00	1:55:00
7	23.04.19	-1	Medium	26	35.8	2	NA	C2	NA	7.65	7.56	7.75	10:36:00	12:41:00	14:41:00	02:05:00	02:00:00	2:05:00	2:00:00
9	23.04.19	-1	High	26	35.5	3	5	3	12	7.95	6.21	7.26	10:42:00	12:48:00	14:43:00	02:06:00	01:55:00	2:06:00	1:55:00
11	23.04.19	-1	High	26	35.5	3	NA	C3	NA	7.77	7.46	7.68	10:42:00	12:51:00	14:46:00	02:09:00	01:55:00	2:09:00	1:55:00
13	23.04.19	-1	Low	26	35.6	4	3	4	17	7.92	6.94	7.92	10:47:00	12:55:00	14:49:00	02:08:00	01:54:00	2:08:00	1:54:00
15	23.04.19	-1	Low	26	35.6	4	NA	C4	NA	7.79	7.51	7.89	10:48:00	12:57:00	14:51:00	02:09:00	01:54:00	2:09:00	1:54:00
17	23.04.19	-1	High	26	35.5	5	2	5	10	8.26	6.97	8.57	10:53:00	13:01:00	14:54:00	02:08:00	01:53:00	2:08:00	1:53:00
19	23.04.19	-1	High	26	35.5	5	NA	C5	NA	8.11	7.69	8.21	10:54:00	13:03:00	14:55:00	02:09:00	01:52:00	2:09:00	1:52:00
21	23.04.19	-1	Medium	26	35.7	6	9	6	22	8.11	6.7	8.69	11:01:00	13:05:00	14:58:00	02:04:00	01:53:00	2:04:00	1:53:00
23	23.04.19	-1	Medium	26	35.7	6	NA	C6	NA	8.04	7.63	8.1	11:02:00	13:07:00	15:00:00	02:05:00	01:53:00	2:05:00	1:53:00
25	23.04.19	-1	Low	26	35.6	7	8	7	28	8.25	5.65	7.88	11:09:00	13:09:00	15:06:00	02:00:00	01:57:00	2:00:00	1:57:00
27	23.04.19	-1	Low	26	35.6	7	NA	C7	NA	8.16	7.7	8.16	11:10:00	13:12:00	15:07:00	02:02:00	01:55:00	2:02:00	1:55:00
29	23.04.19	-1	Control	26	35.5	8	3	8	18	8.23	6.84	8.49	11:15:00	13:16:00	15:15:00	02:01:00	01:59:00	2:01:00	1:59:00
31	23.04.19	-1	Control	26	35.5	8	NA	C8	NA	8.12	7.76	8.09	11:15:00	13:18:00	15:17:00	02:03:00	01:59:00	2:03:00	1:59:00
33	23.04.19	-1	Control	26	36.3	9	4	9	19	7.9	6.41	8.2	11:20:00	13:20:00	15:10:00	02:00:00	01:50:00	2:00:00	1:50:00
35	23.04.19	-1	Control	26	36.3	9	NA	C9	NA	7.75	7.32	7.69	11:21:00	13:22:00	15:13:00	02:01:00	01:51:00	2:01:00	1:51:00
37	23.04.19	-1	Medium	26	35.7	10	4	10	37	7.76	6.01	7.25	11:25:00	13:25:00	15:21:00	02:00:00	01:56:00	2:00:00	1:56:00
39	23.04.19	-1	Medium	26	35.7	10	NA	C10	NA	7.8	7.29	7.83	11:27:00	13:29:00	15:23:00	02:02:00	01:54:00	2:02:00	1:54:00
41	23.04.19	-1	High	26	35.5	11	8	11	14	8.08	6.96	8.23	11:32:00	13:31:00	15:27:00	01:59:00	01:56:00	1:59:00	1:56:00
43	23.04.19	-1	High	26	35.5	11	NA	C11	NA	7.93	7.71	7.99	11:33:00	13:33:00	15:30:00	02:00:00	01:57:00	2:00:00	1:57:00
45	23.04.19	-1	Low	26	35.5	12	8	12	16	8.08	6.78	8.25	11:37:00	13:35:00	15:32:00	01:58:00	01:57:00	1:58:00	1:57:00
47	23.04.19	-1	Low	26	35.5	12	NA	C12	NA	8.1	7.85	8.15	11:39:00	13:37:00	15:34:00	01:58:00	01:57:00	1:58:00	1:57:00
49	24.04.19	1	Control	26	35.1	1	2	1	15	7.83	6.43	7.87	10:40:00	12:41:00	14:47:00	02:01:00	02:06:00	2:01:00	2:06:00
51	24.04.19	1	Control	26	35.1	1	NA	C1	NA	7.76	7.36	7.87	10:44:00	12:44:00	14:48:00	02:00:00	02:04:00	2:00:00	2:04:00
53	24.04.19	1	Medium	26	35.3	2	6	2	12	7.68	6.81	7.84	10:46:00	12:48:00	14:56:00	02:02:00	02:08:00	2:02:00	2:08:00
55	24.04.19	1	Medium	26	35.3	2	NA	C2	NA	7.49	7.17	7.37	10:48:00	12:51:00	14:58:00	02:03:00	02:07:00	2:03:00	2:07:00
57	24.04.19	1	High	26	35.2	3	2	3	19	7.45	5.76	6.99	10:50:00	12:55:00	15:00:00	02:05:00	02:05:00	2:05:00	2:05:00
59	24.04.19	1	High	26	35.2	3	NA	C3	NA	7.34	6.83	7.08	10:51:00	12:59:00	15:02:00	02:08:00	02:03:00	2:08:00	2:03:00
61	24.04.19	1	Low	26	36.0	4	8	4	29	7.59	5.57	7.07	10:56:00	13:04:00	15:04:00	02:08:00	02:00:00	2:08:00	2:00:00
63	24.04.19	1	Low	26	36.0	4	NA	C4	NA	7.62	7.18	7.50	10:57:00	13:06:00	15:05:00	02:09:00	01:59:00	2:09:00	1:59:00
65	24.04.19	1	High	26	35.1	5	6	5	25	7.70	7.25	7.56	11:00:00	13:09:00	15:08:00	02:09:00	01:59:00	2:09:00	1:59:00
67	24.04.19	1	High	26	35.1	5	NA	C5	NA	7.64	7.32	7.56	11:02:00	13:11:00	15:09:00	02:09:00	01:58:00	2:09:00	1:58:00
69	24.04.19	1	Medium	26	35.5	6	3	6	15	7.61	6.53	7.03	11:04:00	13:14:00	15:11:00	02:10:00	01:57:00	2:10:00	1:57:00
71	24.04.19	1	Medium	26	35.5	6	NA	C6	NA	7.62	7.19	7.44	11:06:00	13:17:00	15:13:00	02:11:00	01:56:00	2:11:00	1:56:00
73	24.04.19	1	Low	26	36.0	7	5	7	21	7.77	5.18	8.12	11:08:00	13:20:00	15:21:00	02:12:00	02:01:00	2:12:00	2:01:00
75	24.04.19	1	Low	26	36.0	7	NA	C7	NA	7.80	7.34	7.60	11:12:00	13:24:00	15:22:00	02:12:00	01:58:00	2:12:00	1:58:00
77	24.04.19	1	Control	26	35.3	8	4	8	24	7.97	5.81	7.58	11:16:00	13:27:00	15:23:00	02:11:00	01:56:00	2:11:00	1:56:00
79	24.04.19	1	Control	26	35.3	8	NA	C8	NA	7.86	7.44	7.82	11:17:00	13:30:00	15:24:00	02:13:00	01:54:00	2:13:00	1:54:00
81	24.04.19	1	Control	26	35.9	9	2	9	17	7.86	6.02	7.76	11:20:00	13:34:00	15:18:00	02:14:00	01:44:00	2:14:00	1:44:00
83	24.04.19	1	Control	26	35.9	9	NA	C9	NA	7.79	7.35	7.57	11:21:00	13:36:00	15:19:00	02:15:00	01:43:00	2:15:00	1:43:00
85	24.04.19	1	Medium	26	35.6	10	2	10	28	7.76	4.94	8.17	11:24:00	13:39:00	15:27:00	02:15:00	01:48:00	2:15:00	1:48:00
87	24.04.19	1	Medium	26	35.6	10	NA	C10	NA	7.67	7.23	7.55	11:25:00	13:45:00	15:29:00	02:20:00	01:44:00	2:20:00	1:44:00
89	24.04.19	1	High	26	35.4	11	9	11	14	7.71	7.75	8.47	11:27:00	13:52:00	15:31:00	02:25:00	01:39:00	2:25:00	1:39:00
91	24.04.19	1	High	26	35.4	11	NA	C11	NA	7.73	7.54	7.66	11:29:00	13:53:00	15:34:00	02:24:00	01:41:00	2:24:00	1:41:00
93	24.04.19	1	Low	26	35.6	12	6	12	20	7.79	6.42	7.53	11:30:00	13:55:00	15:47:00	02:25:00	01:52:00	2:25:00	1:52:00
95	24.04.19	1	Low	26	35.6	12	NA	C12	NA	7.80	7.34	7.51	11:31:00	13:58:00	15:49:00	02:27:00	01:51:00	2:27:00	1:51:00
97	25.04.19	2	Control	26	36.4	1	5	1	24	8.02	5.92	7.98	10:18:00	12:22:00	14:32:00	02:04:00	02:10:00	2:04:00	2:10:00
99	25.04.19	2	Control	26	36.4	1	NA	C1	NA	8.05	7.54	8.08	10:20:00	12:26:00	14:33:00	02:06:00	02:07:00	2:06:00	2:07:00
101	25.04.19	2	Medium	26	36.1	2	4	2	20	7.55	5.96	6.66	10:23:00	12:28:00	14:36:00	02:05:00	02:08:00	2:05:00	2:08:00
103	25.04.19	2	Medium	26	36.1	2	NA	C2	NA	7.45	7.06	7.19	10:23:00	12:31:00	14:38:00	02:08:00	02:07:00	2:08:00	2:07:00
105	25.04.19	2	High	26	35.9	3	8	3	21	7.61	5.69	6.21	10:28:00	12:39:00	14:43:00	02:11:00	02:04:00	2:11:00	2:04:00
107	25.04.19	2	High	26	35.9	3	NA	C3	NA	7.52	7.06	7.08	10:29:00	12:40:00	14:45:00	02:11:00	02:05:00	2:11:00	2:05:00
109	25.04.19	2	Low	26	36.8	4	6	4	14	7.76	6.73	7.18	10:34:00	12:45:00	14:46:00	02:11:00	02:01:00	2:11:00	2:01:00
111	25.04.19	2	Low	26	36.8	4	NA	C4	NA	7.73	7.41	7.72	10:36:00	12:46:00	14:48:00	02:10:00	02:02:00	2:10:00	2:02:00
113	25.04.19	2	High	26	36.0	5	7	5	17	8.04	6.69	7.53	10:46:00	12:51:00	14:52:00	02:05:00	02:01:00	2:05:00	2:01:00
115	25.04.19	2	High	26	36.0	5	NA	C5	NA	7.78	7.39	7.79	10:47:00	12:53:00	14:54:00	02:06:00	02:01:00	2:06:00	2:01:00
117	25.04.19	2	Medium	26	36.2	6	3	6	17	7.78	7.23	7.8	10:52:00	12:55:00	14:59:00	02:03:00	02:04:00	2:03:00	2:04:00
119	25.04.19	2	Medium	26	36.2	6	NA	C6	NA	7.65	7.51	7.51	10:53:00	12:58:00	15:00:00	02:05:00	02:02:00	2:05:00	2:02:00
121	25.04.19	2	Low	26	37.0	7	6	7	52	7.8	3.37	9.08	10:58:00	13:03:00	15:03:00	02:05:00	02:00:00	2:05:00	2:00:00
123	25.04.19	2	Low	26	37.0	7	NA	C7	NA	7.77	7.06	7.71	10:59:00	13:07:00	15:06:00	02:08:00	01:59:00	2:08:00	1:59:00
125	25.04.19	2	Control	26	36.3	8	7	8	14	8.02	7.6	7.96	11:03:00	13:09:00	15:08:00	02:06:00	01:59:00	2:06:00	1:59:00
127	25.04.19	2	Control	26	36.3	8	NA	C8	NA	7.97	7.68	7.84	11:04:00	13:10:00	15:10:00	02:06:00	02:00:00	2:06:00	2:00:00
129	25.04.19	2	Control	26	37.2	9	3	9	11	7.89	6.69	8.08	11:08:00	13:15:00	15:12:00	02:07:00	01:57:00	2:07:00	1:57:00
131	25.04.19	2	Control	26	37.2	9	NA	C9	NA	7.78	7.34	8.03	11:09:00	13:18:00	15:13:00	02:09:00	01:55:00	2:09:00	1:55:00
133	25.04.19	2	Medium	26	36.6	10	9	10	20	7.81	6.59	7.82	11:13:00	13:26:00	15:17:00	02:13:00	01:51:00	2:13:00	1:51:00
135	25.04.19	2	Medium	26	36.6	10	NA	C10	NA	7.68	7.28	7.68	11:14:00	13:26:00	15:19:00	02:12:00	01:53:00	2:12:00	1:53:00
137	25.04.19	2	High	26	36.4	11	4	11	15	7.72	6.7	7.74	11:17:00	13:32:00	15:22:00	02:15:00	01:50:00	2:15:00	1:50:00
139	25.04.19	2	High	26	36.4	11	NA	C11	NA	7.64	7.24	7.54	11:19:00	13:33:00	15:22:00	02:14:00	01:49:00	2:14:00	1:49:00
141	25.04.19	2	Low	26	36.4	12	9	12	21	7.73	6.27	8.11	11:21:00	13:37:00	15:25:00	02:16:00	01:48:00	2:16:00	1:48:00
143	25.04.19	2	Low	26	36.4	12	NA	C12	NA	7.61	7.16	7.56	11:22:00	13:40:00	15:27:00	02:18:00	01:47:00	2:18:00	1:47:00
145	26.04.19	3	Control	26	34.8	1	4	1	13	7.09	7.53	8.05	10:31:00	12:43:00	14:43:00	02:12:00	02:00:00	2:12:00	2:00:00
147	26.04.19	3	Control	26	34.8	1	NA	C1	NA	7.76	7.49	7.81	10:31:00	12:44:00	14:48:00	02:13:00	02:04:00	2:13:00	2:04:00
149	26.04.19	3	Medium	26	34.9	2	6	2	12	7.6	6.47	7.4	10:35:00	12:49:00	14:53:00	02:14:00	02:04:00	2:14:00	2:04:00
151	26.04.19	3	Medium	26	34.9	2	NA	C2	NA	7.24	6.94	7.18	10:36:00	12:51:00	14:54:00	02:15:00	02:03:00	2:15:00	2:03:00
153	26.04.19	3	High	26	34.7	3	7	3	7	7.52	6.84	7.43	10:39:00	12:54:00	14:57:00	02:15:00	02:03:00	2:15:00	2:03:00
155	26.04.19	3	High	26	34.7	3	NA	C3	NA	7.46	7.15	7.28	10:39:00	12:59:00	14:58:00	02:20:00	01:59:00	2:20:00	1:59:00
157	26.04.19	3	Low	26	35.7	4	3	4	15	7.71	5.55	7.58	10:43:00	13:04:00	15:01:00	02:21:00	01:57:00	2:21:00	1:57:00
159	26.04.19	3	Low	26	35.7	4	NA	C4	NA	7.63	7.24	7.52	10:44:00	13:06:00	15:02:00	02:22:00	01:56:00	2:22:00	1:56:00
161	26.04.19	3	High	26	35.1	5	1	5	21	7.75	6.49	8.01	10:46:00	13:08:00	15:06:00	02:22:00	01:58:00	2:22:00	1:58:00
163	26.04.19	3	High	26	35.1	5	NA	C5	NA	7.69	7.25	7.58	10:48:00	13:11:00	15:07:00	02:23:00	01:56:00	2:23:00	1:56:00
165	26.04.19	3	Medium	26	35.5	6	9	6	19	7.72	6.44	7.67	10:53:00	13:15:00	15:13:00	02:22:00	01:58:00	2:22:00	1:58:00
167	26.04.19	3	Medium	26	35.5	6	NA	C6	NA	7.6	7.2	7.5	10:53:00	13:16:00	15:14:00	02:23:00	01:58:00	2:23:00	1:58:00
169	26.04.19	3	Low	26	36.1	7	10	7	22	7.85	5.88	8.12	11:03:00	13:20:00	15:17:00	02:17:00	01:57:00	2:17:00	1:57:00
171	26.04.19	3	Low	26	36.1	7	NA	C7	NA	7.71	7.28	7.59	11:04:00	13:22:00	15:20:00	02:18:00	01:58:00	2:18:00	1:58:00
173	26.04.19	3	Control	26	35.5	8	4	8	28	7.88	6.12	7.91	11:07:00	13:31:00	15:30:00	02:24:00	01:59:00	2:24:00	1:59:00
175	26.04.19	3	Control	26	35.5	8	NA	C8	NA	7.87	7.39	7.79	11:09:00	13:33:00	15:32:00	02:24:00	01:59:00	2:24:00	1:59:00
177	26.04.19	3	Control	26	38.1	9	9	9	19	8.17	6.68	7.32	11:14:00	13:35:00	15:34:00	02:21:00	01:59:00	2:21:00	1:59:00
179	26.04.19	3	Control	26	38.1	9	NA	C9	NA	8.13	7.51	7.32	11:15:00	13:35:00	15:35:00	02:20:00	02:00:00	2:20:00	2:00:00
181	26.04.19	3	Medium	26	35.9	10	6	10	37	7.58	5.03	7.92	11:18:00	13:37:00	15:38:00	02:19:00	02:01:00	2:19:00	2:01:00
183	26.04.19	3	Medium	26	35.9	10	NA	C10	NA	7.57	7.19	7.62	11:20:00	13:39:00	15:39:00	02:19:00	02:00:00	2:19:00	2:00:00
185	26.04.19	3	High	26	35.8	11	7	11	30	7.58	5.97	8.28	11:26:00	13:43:00	15:43:00	02:17:00	02:00:00	2:17:00	2:00:00
187	26.04.19	3	High	26	35.8	11	NA	C11	NA	7.61	7.16	7.56	11:28:00	13:45:00	15:45:00	02:17:00	02:00:00	2:17:00	2:00:00
189	26.04.19	3	Low	26	34.7	12	9	12	22	7.38	6.18	7.78	11:31:00	13:49:00	15:50:00	02:18:00	02:01:00	2:18:00	2:01:00
191	26.04.19	3	Low	26	34.7	12	NA	C12	NA	7.44	5.9	7.34	11:33:00	13:49:00	15:51:00	02:16:00	02:02:00	2:16:00	2:02:00
193	27.04.19	4	Control	26	35.4	1	8	1	25	8.13	6.84	7.94	10:00:00	12:20:00	14:23:00	02:20:00	02:03:00	2:20:00	2:03:00
195	27.04.19	4	Control	26	35.4	1	NA	C1	NA	8.01	7.56	8.03	10:14:00	12:23:00	14:24:00	02:09:00	02:01:00	2:09:00	2:01:00
197	27.04.19	4	Medium	26	35.3	2	4	2	45	7.36	6.21	7.41	10:16:00	12:25:00	14:27:00	02:09:00	02:02:00	2:09:00	2:02:00
199	27.04.19	4	Medium	26	35.3	2	NA	C2	NA	7.4	7.03	7.16	10:20:00	12:28:00	14:32:00	02:08:00	02:04:00	2:08:00	2:04:00
201	27.04.19	4	High	26	35.2	3	7	3	9	7.67	7.17	7.25	10:21:00	12:30:00	14:34:00	02:09:00	02:04:00	2:09:00	2:04:00
203	27.04.19	4	High	26	35.2	3	NA	C3	NA	7.57	7.3	7.34	10:25:00	12:31:00	14:36:00	02:06:00	02:05:00	2:06:00	2:05:00
205	27.04.19	4	Low	26	36.2	4	5	4	13	7.72	7.06	7.46	10:27:00	12:33:00	14:38:00	02:06:00	02:05:00	2:06:00	2:05:00
207	27.04.19	4	Low	26	36.2	4	NA	C4	NA	7.68	7.42	7.5	10:29:00	12:35:00	14:40:00	02:06:00	02:05:00	2:06:00	2:05:00
209	27.04.19	4	High	26	35.3	5	4	5	7	7.7	7.31	7.59	11:31:00	12:38:00	14:42:00	01:07:00	02:04:00	1:07:00	2:04:00
211	27.04.19	4	High	26	35.3	5	NA	C5	NA	7.68	7.49	7.48	10:33:00	12:40:00	14:44:00	02:07:00	02:04:00	2:07:00	2:04:00
213	27.04.19	4	Medium	26	35.9	6	5	6	10	7.7	6.54	8.73	10:35:00	12:42:00	14:46:00	02:07:00	02:04:00	2:07:00	2:04:00
215	27.04.19	4	Medium	26	35.9	6	NA	C6	NA	7.63	7.34	7.43	10:36:00	12:46:00	14:49:00	02:10:00	02:03:00	2:10:00	2:03:00
217	27.04.19	4	Low	26	36.4	7	10	7	28	7.86	6.33	8.51	10:39:00	12:47:00	14:51:00	02:08:00	02:04:00	2:08:00	2:04:00
219	27.04.19	4	Low	26	36.4	7	NA	C7	NA	7.69	7.29	7.44	10:40:00	12:49:00	14:54:00	02:09:00	02:05:00	2:09:00	2:05:00
221	27.04.19	4	Control	26	35.9	8	7	8	14	7.95	7.08	8.5	10:43:00	12:53:00	14:56:00	02:10:00	02:03:00	2:10:00	2:03:00
223	27.04.19	4	Control	26	35.9	8	NA	C8	NA	7.97	7.53	8.15	10:44:00	12:55:00	14:57:00	02:11:00	02:02:00	2:11:00	2:02:00
225	27.04.19	4	Control	26	36.5	9	5	9	17	8.08	7.16	8.34	10:46:00	12:57:00	15:01:00	02:11:00	02:04:00	2:11:00	2:04:00
227	27.04.19	4	Control	26	36.5	9	NA	C9	NA	8.12	7.75	8.41	10:47:00	13:00:00	15:02:00	02:13:00	02:02:00	2:13:00	2:02:00
229	27.04.19	4	Medium	26	36.5	10	8	10	15	7.48	6.49	7.77	10:49:00	13:02:00	15:04:00	02:13:00	02:02:00	2:13:00	2:02:00
231	27.04.19	4	Medium	26	36.5	10	NA	C10	NA	7.44	7.05	7.48	10:52:00	13:05:00	15:05:00	02:13:00	02:00:00	2:13:00	2:00:00
233	27.04.19	4	High	26	36.3	11	4	11	15	7.62	6.6	7.95	10:54:00	13:06:00	15:07:00	02:12:00	02:01:00	2:12:00	2:01:00
235	27.04.19	4	High	26	36.3	11	NA	C11	NA	7.54	7.18	7.43	10:55:00	13:09:00	15:08:00	02:14:00	01:59:00	2:14:00	1:59:00
237	27.04.19	4	Low	26	35.2	12	10	12	32	7.64	6.91	7.59	10:58:00	13:11:00	15:10:00	02:13:00	01:59:00	2:13:00	1:59:00
239	27.04.19	4	Low	26	35.2	12	NA	C12	NA	7.55	7.21	7.42	10:59:00	13:12:00	15:11:00	02:13:00	01:59:00	2:13:00	1:59:00
241	30.04.19	7	Control	26	35.9	1	6	1	39	8.13	7.4	7.63	11:30:00	13:41:00	15:00:00	02:11:00	01:19:00	2:11:00	1:19:00
243	30.04.19	7	Control	26	35.9	1	NA	C1	NA	8.00	7.66	8.1	11:31:00	13:43:00	15:02:00	02:12:00	01:19:00	2:12:00	1:19:00
245	30.04.19	7	Medium	26	35.0	2	10	2	62	7.96	5.31	6.47	10:40:00	12:48:00	15:04:00	02:08:00	02:16:00	2:08:00	2:16:00
247	30.04.19	7	Medium	26	35.0	2	NA	C2	NA	7.7	7.15	7.31	10:44:00	12:52:00	15:07:00	02:08:00	02:15:00	2:08:00	2:15:00
249	30.04.19	7	High	26	35.0	3	8	3	23	7.8	7.24	7.25	10:47:00	12:54:00	15:09:00	02:07:00	02:15:00	2:07:00	2:15:00
251	30.04.19	7	High	26	35.0	3	NA	C3	NA	7.69	7.35	7.4	10:48:00	12:56:00	15:12:00	02:08:00	02:16:00	2:08:00	2:16:00
253	30.04.19	7	Low	26	35.7	4	1	4	38	7.92	5.41	7.66	10:51:00	12:58:00	15:13:00	02:07:00	02:15:00	2:07:00	2:15:00
255	30.04.19	7	Low	26	35.7	4	NA	C4	NA	7.86	7.25	7.58	10:52:00	13:02:00	15:15:00	02:10:00	02:13:00	2:10:00	2:13:00
257	30.04.19	7	High	26	34.6	5	8	5	20	7.98	7.08	8.26	10:56:00	13:06:00	15:20:00	02:10:00	02:14:00	2:10:00	2:14:00
259	30.04.19	7	High	26	34.6	5	NA	C5	NA	7.93	7.51	7.79	10:57:00	13:08:00	15:22:00	02:11:00	02:14:00	2:11:00	2:14:00
261	30.04.19	7	Medium	26	35.7	6	3	6	20	7.91	6.53	8.36	11:00:00	13:11:00	15:26:00	02:11:00	02:15:00	2:11:00	2:15:00
263	30.04.19	7	Medium	26	35.7	6	NA	C6	NA	7.79	7.23	7.62	11:01:00	13:13:00	15:28:00	02:12:00	02:15:00	2:12:00	2:15:00
265	30.04.19	7	Low	26	35.9	7	10	7	27	7.95	6.63	8.29	11:04:00	13:15:00	15:30:00	02:11:00	02:15:00	2:11:00	2:15:00
267	30.04.19	7	Low	26	35.9	7	NA	C7	NA	7.91	7.47	NA	12:05:00	13:17:00	15:32:00	01:12:00	02:15:00	1:12:00	2:15:00
269	30.04.19	7	Control	26	35.6	8	3	8	28	8.29	7.01	7.88	11:08:00	13:19:00	15:34:00	02:11:00	02:15:00	2:11:00	2:15:00
271	30.04.19	7	Control	26	35.6	8	NA	C8	NA	8.26	7.84	8.24	11:09:00	13:21:00	15:35:00	02:12:00	02:14:00	2:12:00	2:14:00
273	30.04.19	7	Control	26	36.3	9	9	9	14	8.49	7.91	8.2	11:12:00	13:22:00	15:38:00	02:10:00	02:16:00	2:10:00	2:16:00
275	30.04.19	7	Control	26	36.3	9	NA	C9	NA	8.36	7.95	8.38	11:14:00	13:24:00	15:39:00	02:10:00	02:15:00	2:10:00	2:15:00
277	30.04.19	7	Medium	26	36.6	10	9	10	20	7.59	5.92	7.97	11:17:00	13:26:00	15:42:00	02:09:00	02:16:00	2:09:00	2:16:00
279	30.04.19	7	Medium	26	36.6	10	NA	C10	NA	7.55	6.89	7.33	11:18:00	13:28:00	15:44:00	02:10:00	02:16:00	2:10:00	2:16:00
281	30.04.19	7	High	26	36.1	11	6	11	19	7.9	6.53	6.96	11:21:00	13:31:00	15:46:00	02:10:00	02:15:00	2:10:00	2:15:00
283	30.04.19	7	High	26	36.1	11	NA	C11	NA	7.86	7.29	7.4	11:22:00	13:34:00	15:47:00	02:12:00	02:13:00	2:12:00	2:13:00
285	30.04.19	7	Low	26	35.4	12	4	12	18	7.59	6.34	7.59	11:25:00	13:36:00	15:49:00	02:11:00	02:13:00	2:11:00	2:13:00
287	30.04.19	7	Low	26	35.4	12	NA	C12	NA	7.52	7.14	7.34	11:26:00	13:39:00	15:50:00	02:13:00	02:11:00	2:13:00	2:11:00
289	02.05.19	9	Control	26	33.6	1	10	1	36	7.94	6.61	8.54	10:30:00	12:37:00	14:42:00	02:07:00	02:05:00	2:07:00	2:05:00
291	02.05.19	9	Control	26	33.6	1	NA	C1	NA	7.86	7.48	8.94	10:31:00	12:39:00	14:42:00	02:08:00	02:03:00	2:08:00	2:03:00
293	02.05.19	9	Medium	26	32.3	2	3	2	21	7.59	7.46	7.35	10:34:00	12:43:00	14:47:00	02:09:00	02:04:00	2:09:00	2:04:00
295	02.05.19	9	Medium	26	32.3	2	NA	C2	NA	7.5	7.53	7.57	10:36:00	12:44:00	14:48:00	02:08:00	02:04:00	2:08:00	2:04:00
297	02.05.19	9	High	26	31.5	3	4	3	38	7.62	6.43	7.05	10:39:00	12:47:00	14:50:00	02:08:00	02:03:00	2:08:00	2:03:00
299	02.05.19	9	High	26	31.5	3	NA	C3	NA	7.53	7.37	7.47	10:40:00	12:49:00	14:53:00	02:09:00	02:04:00	2:09:00	2:04:00
301	02.05.19	9	Low	26	31.7	4	3	4	17	7.64	6.28	7.48	10:41:00	12:51:00	14:55:00	02:10:00	02:04:00	2:10:00	2:04:00
303	02.05.19	9	Low	26	31.7	4	NA	C4	NA	7.64	7.54	7.88	10:43:00	12:54:00	14:56:00	02:11:00	02:02:00	2:11:00	2:02:00
305	02.05.19	9	High	26	32.8	5	3	5	32	7.79	7.13	8.08	10:45:00	12:57:00	14:57:00	02:12:00	02:00:00	2:12:00	2:00:00
307	02.05.19	9	High	26	32.8	5	NA	C5	NA	7.71	7.53	7.96	10:46:00	12:59:00	14:58:00	02:13:00	01:59:00	2:13:00	1:59:00
309	02.05.19	9	Medium	26	33.9	6	2	6	25	7.78	7.44	8.48	10:49:00	13:01:00	15:00:00	02:12:00	01:59:00	2:12:00	1:59:00
311	02.05.19	9	Medium	26	33.9	6	NA	C6	NA	7.65	7.64	7.92	10:50:00	13:02:00	15:02:00	02:12:00	02:00:00	2:12:00	2:00:00
313	02.05.19	9	Low	26	33.9	7	10	7	34	7.7	7.51	8.17	10:51:00	13:05:00	15:06:00	02:14:00	02:01:00	2:14:00	2:01:00
315	02.05.19	9	Low	26	33.9	7	NA	C7	NA	7.69	7.63	NA	10:53:00	13:06:00	NA	02:13:00	NA	2:13:00	NA
317	02.05.19	9	Control	26	33.9	8	8	8	27	7.91	8.14	8.04	10:55:00	13:09:00	15:09:00	02:14:00	02:00:00	2:14:00	2:00:00
319	02.05.19	9	Control	26	33.9	8	NA	C8	NA	7.97	8.25	8.24	10:56:00	13:10:00	15:10:00	02:14:00	02:00:00	2:14:00	2:00:00
321	02.05.19	9	Control	26	34.0	9	10	9	26	8.08	7.62	8.35	11:00:00	13:12:00	15:12:00	02:12:00	02:00:00	2:12:00	2:00:00
323	02.05.19	9	Control	26	34.0	9	NA	C9	NA	8.21	8.04	8.6	11:02:00	13:14:00	15:14:00	02:12:00	02:00:00	2:12:00	2:00:00
325	02.05.19	9	Medium	26	34.6	10	7	10	50	7.59	4.21	8.29	11:06:00	13:20:00	15:19:00	02:14:00	01:59:00	2:14:00	1:59:00
327	02.05.19	9	Medium	26	34.6	10	NA	C10	NA	7.24	6.96	7.47	11:07:00	13:23:00	15:23:00	02:16:00	02:00:00	2:16:00	2:00:00
329	02.05.19	9	High	26	34.1	11	1	11	16	7.62	6.83	7.8	11:08:00	13:26:00	15:28:00	02:18:00	02:02:00	2:18:00	2:02:00
331	02.05.19	9	High	26	34.1	11	NA	C11	NA	7.48	7.25	7.53	11:12:00	13:27:00	15:29:00	02:15:00	02:02:00	2:15:00	2:02:00
333	02.05.19	9	Low	26	NA	12	8	12	27	7.6	6.62	7.9	11:15:00	13:30:00	15:30:00	02:15:00	02:00:00	2:15:00	2:00:00
335	02.05.19	9	Low	26	NA	12	NA	C12	NA	7.5	7.34	7.53	11:16:00	13:34:00	15:33:00	02:18:00	01:59:00	2:18:00	1:59:00
337	04.05.19	11	Control	26	36.0	1	4	1	15	8.87	7.4	8.23	11:11:00	13:11:00	15:08:00	02:00:00	01:57:00	2:00:00	1:57:00
339	04.05.19	11	Control	26	36.0	1	NA	C1	NA	7.62	7.64	8.28	11:12:00	13:12:00	15:11:00	02:00:00	01:59:00	2:00:00	1:59:00
341	04.05.19	11	Medium	26	34.8	2	8	2	15	7.78	7.12	7.4	11:16:00	13:13:00	15:13:00	01:57:00	02:00:00	1:57:00	2:00:00
343	04.05.19	11	Medium	26	34.8	2	NA	C2	NA	7.61	7.32	7.38	11:17:00	13:16:00	15:14:00	01:59:00	01:58:00	1:59:00	1:58:00
345	04.05.19	11	High	26	34.1	3	3	3	17	7.82	7.05	7.55	11:20:00	13:18:00	15:18:00	01:58:00	02:00:00	1:58:00	2:00:00
347	04.05.19	11	High	26	34.1	3	NA	C3	NA	7.69	7.4	7.53	11:22:00	13:20:00	15:19:00	01:58:00	01:59:00	1:58:00	1:59:00
349	04.05.19	11	Low	26	34.4	4	6	4	18	7.9	7.06	7.36	11:25:00	13:22:00	15:21:00	01:57:00	01:59:00	1:57:00	1:59:00
351	04.05.19	11	Low	26	34.4	4	NA	C4	NA	7.76	7.41	7.64	11:27:00	13:24:00	15:22:00	01:57:00	01:58:00	1:57:00	1:58:00
353	04.05.19	11	High	26	34.4	5	7	5	33	7.87	6.79	7.65	11:30:00	13:26:00	15:24:00	01:56:00	01:58:00	1:56:00	1:58:00
355	04.05.19	11	High	26	34.4	5	NA	C5	NA	7.79	7.48	7.68	11:31:00	13:28:00	15:28:00	01:57:00	02:00:00	1:57:00	2:00:00
357	04.05.19	11	Medium	26	35.7	6	10	6	23	7.8	7.11	8.1	11:34:00	13:32:00	15:32:00	01:58:00	02:00:00	1:58:00	2:00:00
359	04.05.19	11	Medium	26	35.7	6	NA	C6	NA	7.69	7.4	7.66	11:36:00	13:32:00	15:33:00	01:56:00	02:01:00	1:56:00	2:01:00
361	04.05.19	11	Low	26	35.6	7	5	7	24	7.79	6.63	7.59	11:38:00	13:37:00	15:37:00	01:59:00	02:00:00	1:59:00	2:00:00
363	04.05.19	11	Low	26	35.6	7	NA	C7	NA	7.71	7.41	7.59	11:40:00	13:38:00	15:38:00	01:58:00	02:00:00	1:58:00	2:00:00
365	04.05.19	11	Control	26	35.6	8	2	8	21	8.13	7.39	8.47	11:42:00	13:40:00	15:40:00	01:58:00	02:00:00	1:58:00	2:00:00
367	04.05.19	11	Control	26	35.6	8	NA	C8	NA	8.08	7.78	8.32	11:43:00	13:43:00	15:43:00	02:00:00	02:00:00	2:00:00	2:00:00
369	04.05.19	11	Control	26	35.7	9	1	9	14	8.35	7.59	8.75	11:46:00	13:44:00	15:44:00	01:58:00	02:00:00	1:58:00	2:00:00
371	04.05.19	11	Control	26	35.7	9	NA	C9	NA	8.23	7.92	8.38	11:47:00	13:46:00	15:46:00	01:59:00	02:00:00	1:59:00	2:00:00
373	04.05.19	11	Medium	26	36.7	10	3	10	15	7.65	6.46	7.08	11:50:00	13:53:00	15:53:00	02:03:00	02:00:00	2:03:00	2:00:00
375	04.05.19	11	Medium	26	36.7	10	NA	C10	NA	7.27	7.04	7.13	11:51:00	13:56:00	15:56:00	02:05:00	02:00:00	2:05:00	2:00:00
377	04.05.19	11	High	26	36.3	11	3	11	16	7.75	7.13	7.46	11:53:00	14:00:00	15:58:00	02:07:00	01:58:00	2:07:00	1:58:00
379	04.05.19	11	High	26	36.3	11	NA	C11	NA	7.51	7.4	7.59	11:55:00	14:03:00	15:04:00	02:08:00	01:01:00	2:08:00	1:01:00
381	04.05.19	11	Low	26	35.0	12	9	12	23	7.59	6.39	7.24	11:57:00	14:05:00	15:07:00	02:08:00	01:02:00	2:08:00	1:02:00
383	04.05.19	11	Low	26	35.0	12	NA	C12	NA	7.37	7.05	7.37	11:58:00	14:08:00	15:09:00	02:10:00	01:01:00	2:10:00	1:01:00
385	07.05.19	14	Control	26	35.5	1	4	1	13	8.04	7.31	8.03	10:25:00	12:31:00	14:30:00	02:06:00	01:59:00	2:06:00	1:59:00
387	07.05.19	14	Control	26	35.5	1	NA	C1	NA	7.98	7.62	7.89	10:28:00	12:34:00	14:33:00	02:06:00	01:59:00	2:06:00	1:59:00
389	07.05.19	14	Medium	26	34.6	2	8	2	15	7.8	6.94	7.99	10:33:00	12:38:00	14:36:00	02:05:00	01:58:00	2:05:00	1:58:00
391	07.05.19	14	Medium	26	34.6	2	NA	C2	NA	7.66	7.23	7.4	10:35:00	12:41:00	14:38:00	02:06:00	01:57:00	2:06:00	1:57:00
393	07.05.19	14	High	26	33.7	3	4	3	31	7.93	6.6	7.38	10:38:00	12:44:00	14:44:00	02:06:00	02:00:00	2:06:00	2:00:00
395	07.05.19	14	High	26	33.7	3	NA	C3	NA	7.78	7.37	7.49	10:41:00	12:47:00	14:46:00	02:06:00	01:59:00	2:06:00	1:59:00
397	07.05.19	14	Low	26	34.1	4	9	4	14	7.95	7.26	7.88	10:44:00	12:51:00	14:51:00	02:07:00	02:00:00	2:07:00	2:00:00
399	07.05.19	14	Low	26	34.1	4	NA	C4	NA	7.87	7.47	7.65	10:46:00	12:54:00	14:54:00	02:08:00	02:00:00	2:08:00	2:00:00
401	07.05.19	14	High	26	33.9	5	2	5	19	7.99	7.06	8.22	10:49:00	12:56:00	14:56:00	02:07:00	02:00:00	2:07:00	2:00:00
403	07.05.19	14	High	26	33.9	5	NA	C5	NA	7.84	7.45	7.81	10:50:00	12:58:00	14:58:00	02:08:00	02:00:00	2:08:00	2:00:00
405	07.05.19	14	Medium	26	35.1	6	1	6	29	7.91	5.57	7.88	10:54:00	13:04:00	15:04:00	02:10:00	02:00:00	2:10:00	2:00:00
407	07.05.19	14	Medium	26	35.1	6	NA	C6	NA	7.78	7.21	7.6	10:56:00	13:09:00	15:09:00	02:13:00	02:00:00	2:13:00	2:00:00
409	07.05.19	14	Low	26	34.9	7	9	7	41	7.57	6.2	7.94	11:01:00	13:12:00	15:12:00	02:11:00	02:00:00	2:11:00	2:00:00
411	07.05.19	14	Low	26	34.9	7	NA	C7	NA	7.74	7.49	7.73	11:03:00	13:15:00	15:15:00	02:12:00	02:00:00	2:12:00	2:00:00
413	07.05.19	14	Control	26	34.9	8	3	8	21	8.3	7.32	8.64	11:07:00	13:18:00	15:18:00	02:11:00	02:00:00	2:11:00	2:00:00
415	07.05.19	14	Control	26	34.9	8	NA	C8	NA	8.23	7.92	8.4	11:08:00	13:21:00	15:21:00	02:13:00	02:00:00	2:13:00	2:00:00
417	07.05.19	14	Control	26	35.3	9	7	9	26	8.22	6.79	8.47	11:11:00	13:22:00	15:23:00	02:11:00	02:01:00	2:11:00	2:01:00
419	07.05.19	14	Control	26	35.3	9	NA	C9	NA	8.13	7.64	8.28	11:12:00	13:25:00	15:25:00	02:13:00	02:00:00	2:13:00	2:00:00
421	07.05.19	14	Medium	26	36.1	10	9	10	21	7.96	6.56	7.91	11:15:00	13:27:00	15:27:00	02:12:00	02:00:00	2:12:00	2:00:00
423	07.05.19	14	Medium	26	36.1	10	NA	C10	NA	7.77	7.28	7.6	11:16:00	13:31:00	15:31:00	02:15:00	02:00:00	2:15:00	2:00:00
425	07.05.19	14	High	26	35.9	11	7	11	30	7.97	6.76	7.86	11:19:00	13:33:00	15:33:00	02:14:00	02:00:00	2:14:00	2:00:00
427	07.05.19	14	High	26	35.9	11	NA	C11	NA	7.83	7.45	7.66	11:21:00	13:35:00	15:35:00	02:14:00	02:00:00	2:14:00	2:00:00
429	07.05.19	14	Low	26	35.4	12	10	12	35	7.92	5.65	7.41	11:25:00	13:36:00	15:37:00	02:11:00	02:01:00	2:11:00	2:01:00
431	07.05.19	14	Low	26	35.4	12	NA	C12	NA	7.83	7.24	7.55	11:27:00	13:40:00	15:40:00	02:13:00	02:00:00	2:13:00	2:00:00
433	14.05.19	21	Control	26	36.1	1	5	1	19	8.1	7.04	8.03	09:18:00	11:31:00	14:15:00	02:13:00	02:44:00	2:13:00	2:44:00
435	14.05.19	21	Control	26	36.1	1	NA	C1	NA	7.92	7.72	8.09	09:20:00	11:35:00	14:16:00	02:15:00	02:41:00	2:15:00	2:41:00
437	14.05.19	21	Medium	26	35.3	2	9	2	33	7.93	6.63	8.19	09:31:00	11:36:00	14:20:00	02:05:00	02:44:00	2:05:00	2:44:00
439	14.05.19	21	Medium	26	35.3	2	NA	C2	NA	7.79	7.59	7.55	09:32:00	11:39:00	14:22:00	02:07:00	02:43:00	2:07:00	2:43:00
441	14.05.19	21	High	26	34.5	3	6	3	49	7.95	6.07	8.08	09:34:00	11:43:00	14:25:00	02:09:00	02:42:00	2:09:00	2:42:00
443	14.05.19	21	High	26	34.5	3	NA	C3	NA	7.85	7.59	7.58	09:35:00	11:49:00	14:29:00	02:14:00	02:40:00	2:14:00	2:40:00
445	14.05.19	21	Low	26	34.5	4	7	4	55	8.00	6.05	8.22	09:37:00	11:52:00	14:33:00	02:15:00	02:41:00	2:15:00	2:41:00
447	14.05.19	21	Low	26	34.5	4	NA	C4	NA	7.92	7.6	7.73	09:39:00	11:54:00	14:34:00	02:15:00	02:40:00	2:15:00	2:40:00
449	14.05.19	21	High	26	34.5	5	1	5	33	8.06	6.84	7.53	09:41:00	11:57:00	14:37:00	02:16:00	02:40:00	2:16:00	2:40:00
451	14.05.19	21	High	26	34.5	5	NA	C5	NA	7.93	7.56	7.7	09:43:00	11:59:00	14:37:00	02:16:00	02:38:00	2:16:00	2:38:00
453	14.05.19	21	Medium	26	35.8	6	5	6	28	7.95	6.82	7.66	09:45:00	12:02:00	14:39:00	02:17:00	02:37:00	2:17:00	2:37:00
455	14.05.19	21	Medium	26	35.8	6	NA	C6	NA	7.87	7.49	7.79	09:46:00	12:03:00	14:40:00	02:17:00	02:37:00	2:17:00	2:37:00
457	14.05.19	21	Low	26	35.5	7	3	7	NA	7.99	6.99	NA	09:48:00	12:06:00	NA	02:18:00	NA	2:18:00	NA
459	14.05.19	21	Low	26	35.5	7	NA	C7	NA	7.88	7.49	7.71	09:49:00	12:08:00	14:44:00	02:19:00	02:36:00	2:19:00	2:36:00
461	14.05.19	21	Control	26	35.4	8	5	8	24	7.98	7.16	9.09	09:50:00	12:10:00	14:48:00	02:20:00	02:38:00	2:20:00	2:38:00
463	14.05.19	21	Control	26	35.4	8	NA	C8	NA	8.02	7.72	8.35	09:51:00	12:12:00	14:49:00	02:21:00	02:37:00	2:21:00	2:37:00
465	14.05.19	21	Control	26	35.3	9	2	9	33	8.09	6.74	8.56	09:56:00	12:15:00	14:51:00	02:19:00	02:36:00	2:19:00	2:36:00
467	14.05.19	21	Control	26	35.3	9	NA	C9	NA	8.00	7.5	7.92	09:59:00	12:16:00	14:52:00	02:17:00	02:36:00	2:17:00	2:36:00
469	14.05.19	21	Medium	26	36.0	10	6	10	25	7.88	7.1	7.81	10:01:00	12:19:00	14:54:00	02:18:00	02:35:00	2:18:00	2:35:00
471	14.05.19	21	Medium	26	36.0	10	NA	C10	NA	7.75	7.51	7.61	10:02:00	12:21:00	14:55:00	02:19:00	02:34:00	2:19:00	2:34:00
473	14.05.19	21	High	26	35.7	11	7	11	36	7.81	6.87	7.73	10:03:00	12:24:00	14:56:00	02:21:00	02:32:00	2:21:00	2:32:00
475	14.05.19	21	High	26	35.7	11	NA	C11	NA	7.81	7.52	7.58	10:05:00	12:26:00	14:57:00	02:21:00	02:31:00	2:21:00	2:31:00
477	14.05.19	21	Low	26	35.8	12	7	12	24	7.87	6.97	7.77	10:06:00	12:29:00	14:59:00	02:23:00	02:30:00	2:23:00	2:30:00
479	14.05.19	21	Low	26	35.8	12	NA	C12	NA	7.91	7.5	7.71	10:08:00	12:31:00	15:00:00	02:23:00	02:29:00	2:23:00	2:29:00
