# Supplementary material for: Photosynthesis and respiration of the soft coral Xenia umbellata respond to warming but not to organic carbon eutrophication
Source: PeerJ. 2021 Jul 27;9:e11663. doi: 10.7717/peerj.11663 (PMC8323596; doi:10.7717/peerj.11663)
Supplement: Supplemental Information 2 [file peerj-09-11663-s002.xlsx]

## Sheet: Sheet1
row	date	day	treatment	temperature	salinity	tank_ID	colony	jar	polyps	Sd_Oxygen	Ed_Sl_Oxygen	El_Oxygen	Sd_time	Sl_time	El_time	Time Sd_Ed_Sl	Time Ed_Sl_El	Mins_Time Sd_Ed_Sl	Mins_Time Ed_Sl_El
433	14.05.19	21	Control	26	36.1	1	5	1	19	8.1	7.04	8.03	09:18:00	11:31:00	14:15:00	02:13:00	02:44:00	133	164
435	14.05.19	21	Control	26	36.1	1	NA	C1	NA	7.92	7.72	8.09	09:20:00	11:35:00	14:16:00	02:15:00	02:41:00	135	161
437	14.05.19	21	Medium	26	35.3	2	9	2	33	7.93	6.63	8.19	09:31:00	11:36:00	14:20:00	02:05:00	02:44:00	125	164
439	14.05.19	21	Medium	26	35.3	2	NA	C2	NA	7.79	7.59	7.55	09:32:00	11:39:00	14:22:00	02:07:00	02:43:00	127	163
441	14.05.19	21	High	26	34.5	3	6	3	49	7.95	6.07	8.08	09:34:00	11:43:00	14:25:00	02:09:00	02:42:00	129	162
443	14.05.19	21	High	26	34.5	3	NA	C3	NA	7.85	7.59	7.58	09:35:00	11:49:00	14:29:00	02:14:00	02:40:00	134	160
445	14.05.19	21	Low	26	34.5	4	7	4	55	8.00	6.05	8.22	09:37:00	11:52:00	14:33:00	02:15:00	02:41:00	135	161
447	14.05.19	21	Low	26	34.5	4	NA	C4	NA	7.92	7.6	7.73	09:39:00	11:54:00	14:34:00	02:15:00	02:40:00	135	160
449	14.05.19	21	High	26	34.5	5	1	5	33	8.06	6.84	7.53	09:41:00	11:57:00	14:37:00	02:16:00	02:40:00	136	160
451	14.05.19	21	High	26	34.5	5	NA	C5	NA	7.93	7.56	7.7	09:43:00	11:59:00	14:37:00	02:16:00	02:38:00	136	158
453	14.05.19	21	Medium	26	35.8	6	5	6	28	7.95	6.82	7.66	09:45:00	12:02:00	14:39:00	02:17:00	02:37:00	137	157
455	14.05.19	21	Medium	26	35.8	6	NA	C6	NA	7.87	7.49	7.79	09:46:00	12:03:00	14:40:00	02:17:00	02:37:00	137	157
457	14.05.19	21	Low	26	35.5	7	3	7	NA	7.99	6.99	NA	09:48:00	12:06:00	NA	02:18:00	NA	138	NA
459	14.05.19	21	Low	26	35.5	7	NA	C7	NA	7.88	7.49	7.71	09:49:00	12:08:00	14:44:00	02:19:00	02:36:00	139	156
461	14.05.19	21	Control	26	35.4	8	5	8	24	7.98	7.16	9.09	09:50:00	12:10:00	14:48:00	02:20:00	02:38:00	140	158
463	14.05.19	21	Control	26	35.4	8	NA	C8	NA	8.02	7.72	8.35	09:51:00	12:12:00	14:49:00	02:21:00	02:37:00	141	157
465	14.05.19	21	Control	26	35.3	9	2	9	33	8.09	6.74	8.56	09:56:00	12:15:00	14:51:00	02:19:00	02:36:00	139	156
467	14.05.19	21	Control	26	35.3	9	NA	C9	NA	8.00	7.5	7.92	09:59:00	12:16:00	14:52:00	02:17:00	02:36:00	137	156
469	14.05.19	21	Medium	26	36.0	10	6	10	25	7.88	7.1	7.81	10:01:00	12:19:00	14:54:00	02:18:00	02:35:00	138	155
471	14.05.19	21	Medium	26	36.0	10	NA	C10	NA	7.75	7.51	7.61	10:02:00	12:21:00	14:55:00	02:19:00	02:34:00	139	154
473	14.05.19	21	High	26	35.7	11	7	11	36	7.81	6.87	7.73	10:03:00	12:24:00	14:56:00	02:21:00	02:32:00	141	152
475	14.05.19	21	High	26	35.7	11	NA	C11	NA	7.81	7.52	7.58	10:05:00	12:26:00	14:57:00	02:21:00	02:31:00	141	151
477	14.05.19	21	Low	26	35.8	12	7	12	24	7.87	6.97	7.77	10:06:00	12:29:00	14:59:00	02:23:00	02:30:00	143	150
479	14.05.19	21	Low	26	35.8	12	NA	C12	NA	7.91	7.5	7.71	10:08:00	12:31:00	15:00:00	02:23:00	02:29:00	143	149
481	14.05.19	21	ControlT	26	35.4	13	5	13	49	8.31	5.86	7.78	10:16:00	12:35:00	15:02:00	02:19:00	02:27:00	139	147
483	14.05.19	21	ControlT	26	35.4	13	NA	C13	NA	8.2	7.68	8.16	10:17:00	12:37:00	15:03:00	02:20:00	02:26:00	140	146
485	14.05.19	21	ControlT	26	35.6	14	5	14	19	8.16	7.00	7.94	10:20:00	12:40:00	15:06:00	02:20:00	02:26:00	140	146
487	14.05.19	21	ControlT	26	35.6	14	NA	C14	NA	8.12	7.86	8.19	10:22:00	12:42:00	15:07:00	02:20:00	02:25:00	140	145
489	14.05.19	21	ControlT	26	35.1	15	4	15	22	8.16	6.92	7.68	10:24:00	12:45:00	15:10:00	02:21:00	02:25:00	141	145
491	14.05.19	21	ControlT	26	35.1	15	NA	C15	NA	8.2	7.87	8.01	10:26:00	12:47:00	15:11:00	02:21:00	02:24:00	141	144
493	14.05.19	21	ControlT	26	35.7	16	2	16	26	8.06	7.23	7.79	10:28:00	12:50:00	15:13:00	02:22:00	02:23:00	142	143
495	14.05.19	21	ControlT	26	35.7	16	NA	C16	NA	7.91	7.49	7.79	10:29:00	12:52:00	15:14:00	02:23:00	02:22:00	143	142
497	20.05.19	27	Control	28	35.0	1	1	1	28	7.85	6.55	6.78	09:38:00	12:19:00	14:33:00	02:41:00	02:14:00	161	134
499	20.05.19	27	Control	28	35.0	1	NA	C1	NA	7.72	7.25	7.38	09:39:00	12:20:00	14:35:00	02:41:00	02:15:00	161	135
501	20.05.19	27	Medium	28	34.6	2	4	2	37	7.4	5.98	6.36	09:45:00	12:23:00	14:37:00	02:38:00	02:14:00	158	134
503	20.05.19	27	Medium	28	34.6	2	NA	C2	NA	7.25	6.77	6.63	09:46:00	12:25:00	14:39:00	02:39:00	02:14:00	159	134
505	20.05.19	27	High	28	34.6	3	2	3	44	7.28	5.56	5.75	09:48:00	12:28:00	14:41:00	02:40:00	02:13:00	160	133
507	20.05.19	27	High	28	34.6	3	NA	C3	NA	7.08	6.47	6.46	09:50:00	12:30:00	14:43:00	02:40:00	02:13:00	160	133
509	20.05.19	27	Low	28	35.2	4	7	4	65	7.36	5.46	6.19	09:51:00	12:34:00	14:45:00	02:43:00	02:11:00	163	131
511	20.05.19	27	Low	28	35.2	4	NA	C4	NA	7.32	6.74	6.71	09:52:00	12:36:00	14:46:00	02:44:00	02:10:00	164	130
513	20.05.19	27	High	28	35.2	5	9	5	74	7.29	5.55	6.27	09:54:00	12:40:00	14:50:00	02:46:00	02:10:00	166	130
515	20.05.19	27	High	28	35.2	5	NA	C5	NA	7.19	6.62	6.76	09:55:00	12:41:00	14:51:00	02:46:00	02:10:00	166	130
517	20.05.19	27	Medium	28	34.8	6	7	6	22	7.52	6.62	6.9	09:57:00	12:44:00	14:55:00	02:47:00	02:11:00	167	131
519	20.05.19	27	Medium	28	34.8	6	NA	C6	NA	7.39	6.91	7.13	09:58:00	12:45:00	14:56:00	02:47:00	02:11:00	167	131
521	20.05.19	27	Low	28	35.1	7	7	7	32	7.47	6.08	6.65	10:01:00	12:50:00	14:58:00	02:49:00	02:08:00	169	128
523	20.05.19	27	Low	28	35.1	7	NA	C7	NA	7.47	6.73	6.98	10:02:00	12:51:00	14:59:00	02:49:00	02:08:00	169	128
525	20.05.19	27	Control	28	35.1	8	5	8	27	7.7	6.61	7.61	10:03:00	12:54:00	15:01:00	02:51:00	02:07:00	171	127
527	20.05.19	27	Control	28	35.1	8	NA	C8	NA	7.74	7.37	7.78	10:05:00	12:56:00	15:02:00	02:51:00	02:06:00	171	126
529	20.05.19	27	Control	28	35.3	9	6	9	37	7.83	6.43	7.49	10:06:00	12:59:00	15:04:00	02:53:00	02:05:00	173	125
531	20.05.19	27	Control	28	35.3	9	NA	C9	NA	7.78	7.17	7.78	10:09:00	13:01:00	15:05:00	02:52:00	02:04:00	172	124
533	20.05.19	27	Medium	28	35.9	10	4	10	39	7.63	5.85	6.72	10:11:00	13:05:00	15:07:00	02:54:00	02:02:00	174	122
535	20.05.19	27	Medium	28	35.9	10	NA	C10	NA	7.61	6.84	7.07	10:14:00	13:06:00	15:08:00	02:52:00	02:02:00	172	122
537	20.05.19	27	High	28	35.6	11	10	11	34	7.54	6.35	6.74	10:15:00	13:09:00	15:10:00	02:54:00	02:01:00	174	121
539	20.05.19	27	High	28	35.6	11	NA	C11	NA	7.54	6.92	7.15	10:16:00	13:10:00	15:11:00	02:54:00	02:01:00	174	121
541	20.05.19	27	Low	28	35.9	12	5	12	55	7.96	4.71	5.92	10:18:00	13:14:00	15:14:00	02:56:00	02:00:00	176	120
543	20.05.19	27	Low	28	35.9	12	NA	C12	NA	7.43	6.59	6.81	10:19:00	13:16:00	15:15:00	02:57:00	01:59:00	177	119
545	20.05.19	27	ControlT	28	35.6	13	4	13	14	7.9	6.97	7.55	10:22:00	13:17:00	15:18:00	02:55:00	02:01:00	175	121
547	20.05.19	27	ControlT	28	35.6	13	NA	C13	NA	8.02	7.46	7.91	10:23:00	13:19:00	15:20:00	02:56:00	02:01:00	176	121
549	20.05.19	27	ControlT	28	36.4	14	3	14	54	8.12	4.85	7.79	10:24:00	14:23:00	15:22:00	03:59:00	00:59:00	239	59
551	20.05.19	27	ControlT	28	36.4	14	NA	C14	NA	8.12	7.37	7.83	10:25:00	13:25:00	15:23:00	03:00:00	01:58:00	180	118
553	20.05.19	27	ControlT	28	35.6	15	3	15	49	8.06	6.06	7.25	10:26:00	13:29:00	15:25:00	03:03:00	01:56:00	183	116
555	20.05.19	27	ControlT	28	35.6	15	NA	C15	NA	7.96	7.37	7.75	10:28:00	13:31:00	15:26:00	03:03:00	01:55:00	183	115
557	20.05.19	27	ControlT	28	36.6	16	4	16	35	7.98	6.11	7.31	10:30:00	13:33:00	15:28:00	03:03:00	01:55:00	183	115
559	20.05.19	27	ControlT	28	36.6	16	NA	C16	NA	7.92	7.27	7.7	10:31:00	13:35:00	15:30:00	03:04:00	01:55:00	184	115
561	21.05.19	28	Control	28	34.7	1	5	1	38	7.81	7.02	7.49	09:40:00	11:41:00	13:51:00	02:01:00	02:10:00	121	130
563	21.05.19	28	Control	28	34.7	1	NA	C1	NA	7.68	7.47	7.75	09:41:00	11:42:00	13:52:00	02:01:00	02:10:00	121	130
565	21.05.19	28	Medium	28	34.5	2	5	2	79	7.2	5.32	7.01	09:43:00	11:46:00	13:55:00	02:03:00	02:09:00	123	129
567	21.05.19	28	Medium	28	34.5	2	NA	C2	NA	7.1	6.57	6.73	09:44:00	11:48:00	13:57:00	02:04:00	02:09:00	124	129
569	21.05.19	28	High	28	34.5	3	5	3	42	7.17	5.92	6.44	09:47:00	11:51:00	14:00:00	02:04:00	02:09:00	124	129
571	21.05.19	28	High	28	34.5	3	NA	C3	NA	7.07	6.57	6.59	09:48:00	11:52:00	14:00:00	02:04:00	02:08:00	124	128
573	21.05.19	28	Low	28	35.0	4	3	4	29	7.28	6.62	7.17	09:49:00	11:56:00	14:02:00	02:07:00	02:06:00	127	126
575	21.05.19	28	Low	28	35.0	4	NA	C4	NA	7.27	6.95	6.88	09:50:00	11:57:00	14:03:00	02:07:00	02:06:00	127	126
577	21.05.19	28	High	28	35.1	5	2	5	28	7.36	6.60	7.02	09:52:00	11:59:00	14:05:00	02:07:00	02:06:00	127	126
579	21.05.19	28	High	28	35.1	5	NA	C5	NA	7.29	6.87	6.97	09:53:00	12:00:00	14:06:00	02:07:00	02:06:00	127	126
581	21.05.19	28	Medium	28	34.7	6	9	6	38	7.51	6.70	6.70	09:54:00	12:02:00	14:08:00	02:08:00	02:06:00	128	126
583	21.05.19	28	Medium	28	34.7	6	NA	C6	NA	7.45	7.05	7.13	09:55:00	12:04:00	14:10:00	02:09:00	02:06:00	129	126
585	21.05.19	28	Low	28	35.0	7	8	7	70	7.65	5.44	6.53	09:59:00	12:08:00	14:12:00	02:09:00	02:04:00	129	124
587	21.05.19	28	Low	28	35.0	7	NA	C7	NA	7.56	6.98	7.20	10:00:00	12:09:00	14:13:00	02:09:00	02:04:00	129	124
589	21.05.19	28	Control	28	35.0	8	3	8	43	7.72	6.69	7.72	10:01:00	12:12:00	14:16:00	02:11:00	02:04:00	131	124
591	21.05.19	28	Control	28	35.0	8	NA	C8	NA	7.81	7.43	7.89	10:02:00	12:13:00	14:18:00	02:11:00	02:05:00	131	125
593	21.05.19	28	Control	28	35.3	9	4	9	13	7.89	7.06	7.02	10:04:00	12:16:00	14:22:00	02:12:00	02:06:00	132	126
595	21.05.19	28	Control	28	35.7	9	NA	C9	NA	7.89	7.52	8.00	10:05:00	12:17:00	14:24:00	02:12:00	02:07:00	132	127
597	21.05.19	28	Medium	28	35.7	10	4	10	40	7.53	6.58	6.90	10:07:00	12:20:00	14:27:00	02:13:00	02:07:00	133	127
599	21.05.19	28	Medium	28	35.3	10	NA	C10	NA	7.45	7.00	5.75	10:08:00	12:22:00	14:42:00	02:14:00	02:20:00	134	140
601	21.05.19	28	High	28	35.3	11	8	11	17	7.47	6.75	5.85	10:11:00	12:24:00	14:44:00	02:13:00	02:20:00	133	140
603	21.05.19	28	High	28	35.5	11	NA	C11	NA	7.44	7.06	5.87	10:12:00	12:25:00	14:45:00	02:13:00	02:20:00	133	140
605	21.05.19	28	Low	28	35.5	12	8	12	44	7.39	6.12	5.66	10:13:00	12:28:00	14:48:00	02:15:00	02:20:00	135	140
607	21.05.19	28	Low	28	34.6	12	NA	C12	NA	7.29	6.78	5.74	10:14:00	12:29:00	14:50:00	02:15:00	02:21:00	135	141
609	21.05.19	28	ControlT	28	34.6	13	4	13	14	7.86	7.24	6.51	10:16:00	12:31:00	14:52:00	02:15:00	02:21:00	135	141
611	21.05.19	28	ControlT	28	34.6	13	NA	C13	NA	7.98	7.61	6.44	10:17:00	12:32:00	14:54:00	02:15:00	02:22:00	135	142
613	21.05.19	28	ControlT	28	35.8	14	7	14	53	8.05	6.72	6.30	10:18:00	12:33:00	14:55:00	02:15:00	02:22:00	135	142
615	21.05.19	28	ControlT	28	35.8	14	NA	C14	NA	8.1	7.69	6.49	10:19:00	12:35:00	14:47:00	02:16:00	02:12:00	136	132
617	21.05.19	28	ControlT	28	34.7	15	4	15	40	7.98	6.82	6.40	10:20:00	12:37:00	14:58:00	02:17:00	02:21:00	137	141
619	21.05.19	28	ControlT	28	34.7	15	NA	C15	NA	7.93	7.60	6.40	10:21:00	12:39:00	15:00:00	02:18:00	02:21:00	138	141
621	21.05.19	28	ControlT	28	35.8	16	8	16	20	8.09	7.22	6.38	10:23:00	12:40:00	15:02:00	02:17:00	02:22:00	137	142
623	21.05.19	28	ControlT	28	35.8	16	NA	C16	NA	8.01	7.59	6.47	10:25:00	12:41:00	15:03:00	02:16:00	02:22:00	136	142
625	22.05.19	29	Control	28	35.2	1	7	1	46	6.63	5.43	6.68	09:35:00	11:37:00	13:44:00	02:02:00	02:07:00	122	127
627	22.05.19	29	Control	28	35.2	1	NA	C1	NA	6.45	6.11	6.56	09:36:00	11:39:00	13:45:00	02:03:00	02:06:00	123	126
629	22.05.19	29	Medium	28	33.3	2	3	2	31	6.17	5.46	5.84	09:38:00	11:41:00	13:48:00	02:03:00	02:07:00	123	127
631	22.05.19	29	Medium	28	33.3	2	NA	C2	NA	6.04	5.71	5.96	09:39:00	11:42:00	13:49:00	02:03:00	02:07:00	123	127
633	22.05.19	29	High	28	33.8	3	4	3	51	6.01	5.37	5.3	09:41:00	11:44:00	13:52:00	02:03:00	02:08:00	123	128
635	22.05.19	29	High	28	33.8	3	NA	C3	NA	5.98	5.64	5.57	09:42:00	11:46:00	13:53:00	02:04:00	02:07:00	124	127
637	22.05.19	29	Low	28	33.7	4	8	4	65	6.11	4.92	5.8	09:43:00	11:48:00	13:55:00	02:05:00	02:07:00	125	127
639	22.05.19	29	Low	28	33.7	4	NA	C4	NA	6.12	5.76	5.86	09:44:00	11:50:00	13:55:00	02:06:00	02:05:00	126	125
641	22.05.19	29	High	28	34.4	5	4	5	17	6.07	5.52	5.76	09:45:00	11:54:00	13:57:00	02:09:00	02:03:00	129	123
643	22.05.19	29	High	28	34.4	5	NA	C5	NA	6.02	5.73	5.78	09:46:00	11:55:00	13:58:00	02:09:00	02:03:00	129	123
645	22.05.19	29	Medium	28	34.0	6	6	6	35	6.22	5.61	5.87	09:49:00	11:58:00	13:59:00	02:09:00	02:01:00	129	121
647	22.05.19	29	Medium	28	34.0	6	NA	C6	NA	6.17	5.86	5.92	09:50:00	11:59:00	14:00:00	02:09:00	02:01:00	129	121
649	22.05.19	29	Low	28	34.3	7	2	7	44	6.06	4.99	5.74	09:51:00	12:02:00	14:02:00	02:11:00	02:00:00	131	120
651	22.05.19	29	Low	28	34.3	7	NA	C7	NA	5.97	5.55	5.68	09:52:00	12:03:00	14:03:00	02:11:00	02:00:00	131	120
653	22.05.19	29	Control	28	34.6	8	9	8	60	6.32	5.03	6.09	09:53:00	12:05:00	14:05:00	02:12:00	02:00:00	132	120
655	22.05.19	29	Control	28	34.6	8	NA	C8	NA	6.39	6.1	6.36	09:54:00	12:07:00	14:06:00	02:13:00	01:59:00	133	119
657	22.05.19	29	Control	28	34.7	9	1	9	24	6.45	6.18	6.73	09:56:00	12:09:00	14:11:00	02:13:00	02:02:00	133	122
659	22.05.19	29	Control	28	34.7	9	NA	C9	NA	6.43	6.16	6.62	09:57:00	12:10:00	14:13:00	02:13:00	02:03:00	133	123
661	22.05.19	29	Medium	28	35.3	10	3	10	21	6.38	5.46	5.88	09:58:00	12:13:00	14:17:00	02:15:00	02:04:00	135	124
663	22.05.19	29	Medium	28	35.3	10	NA	C10	NA	6.22	5.81	6.06	09:59:00	12:14:00	14:18:00	02:15:00	02:04:00	135	124
665	22.05.19	29	High	28	34.8	11	9	11	25	6.27	5.52	6.07	10:02:00	12:16:00	14:20:00	02:14:00	02:04:00	134	124
667	22.05.19	29	High	28	34.8	11	NA	C11	NA	6.21	5.91	6.14	10:03:00	12:17:00	14:20:00	02:14:00	02:03:00	134	123
669	22.05.19	29	Low	28	35.1	12	10	12	54	6.23	4.88	5.81	10:05:00	12:19:00	14:22:00	02:14:00	02:03:00	134	123
671	22.05.19	29	Low	28	35.1	12	NA	C12	NA	6.19	5.74	5.97	10:06:00	12:21:00	14:24:00	02:15:00	02:03:00	135	123
673	22.05.19	29	ControlT	28	34.3	13	3	13	44	6.46	5.85	5.88	10:08:00	12:23:00	14:27:00	02:15:00	02:04:00	135	124
675	22.05.19	29	ControlT	28	34.3	13	NA	C13	NA	6.55	6.25	6.45	10:09:00	12:24:00	14:28:00	02:15:00	02:04:00	135	124
677	22.05.19	29	ControlT	28	35.3	14	3	14	56	6.6	5.69	6.25	10:10:00	12:26:00	14:30:00	02:16:00	02:04:00	136	124
679	22.05.19	29	ControlT	28	35.3	14	NA	C14	NA	6.64	6.31	6.45	10:11:00	12:28:00	14:31:00	02:17:00	02:03:00	137	123
681	22.05.19	29	ControlT	28	35.8	15	5	15	14	6.62	6.23	6.5	10:12:00	12:31:00	14:32:00	02:19:00	02:01:00	139	121
683	22.05.19	29	ControlT	28	35.8	15	NA	C15	NA	6.59	6.43	6.51	10:13:00	12:33:00	14:33:00	02:20:00	02:00:00	140	120
685	22.05.19	29	ControlT	28	35.7	16	2	16	47	6.66	5.39	6.16	10:16:00	12:35:00	14:36:00	02:19:00	02:01:00	139	121
687	22.05.19	29	ControlT	28	35.7	16	NA	C16	NA	6.59	6.21	6.5	10:16:00	12:37:00	14:37:00	02:21:00	02:00:00	141	120
689	28.05.19	35	Control	28	35.7	1	8	1	51	6.48	5.70	6.38	09:27:00	11:27:00	13:39:00	02:00:00	02:12:00	120	132
691	28.05.19	35	Control	30	35.7	1	NA	C1	NA	6.38	6.16	6.61	09:29:00	11:29:00	13:41:00	02:00:00	02:12:00	120	132
693	28.05.19	35	Medium	30	35.7	2	10	2	60	6.16	6.50	5.70	09:31:00	11:31:00	13:42:00	02:00:00	02:11:00	120	131
695	28.05.19	35	Medium	30	35.7	2	NA	C2	NA	5.94	5.82	5.69	09:33:00	11:33:00	13:44:00	02:00:00	02:11:00	120	131
697	28.05.19	35	High	30	35.3	3	5	3	56	5.92	5.22	5.48	09:35:00	11:35:00	13:46:00	02:00:00	02:11:00	120	131
699	28.05.19	35	High	30	35.3	3	NA	C3	NA	5.92	5.00	5.63	09:37:00	11:36:00	13:48:00	01:59:00	02:12:00	119	132
701	28.05.19	35	Low	30	36.1	4	7	4	66	6.23	5.41	5.70	09:40:00	11:38:00	13:50:00	01:58:00	02:12:00	118	132
703	28.05.19	35	Low	30	36.1	4	NA	C4	NA	6.14	5.88	5.99	09:41:00	11:40:00	13:51:00	01:59:00	02:11:00	119	131
705	28.05.19	35	High	30	35.8	5	4	5	23	6.11	5.64	5.88	09:51:00	11:43:00	13:55:00	01:52:00	02:12:00	112	132
707	28.05.19	35	High	30	35.8	5	NA	C5	NA	6.20	5.73	5.80	09:47:00	11:44:00	13:55:00	01:57:00	02:11:00	117	131
709	28.05.19	35	Medium	30	35.2	6	9	6	40	6.19	5.60	5.73	09:50:00	11:46:00	13:57:00	01:56:00	02:11:00	116	131
711	28.05.19	35	Medium	30	35.2	6	NA	C6	NA	6.20	5.90	5.91	09:52:00	11:48:00	13:58:00	01:56:00	02:10:00	116	130
713	28.05.19	35	Low	30	35.9	7	1	7	71	6.28	5.04	5.78	09:58:00	11:51:00	14:01:00	01:53:00	02:10:00	113	130
715	28.05.19	35	Low	30	35.9	7	NA	C7	NA	6.19	5.85	6.10	09:59:00	11:54:00	14:02:00	01:55:00	02:08:00	115	128
717	28.05.19	35	Control	30	36.0	8	10	8	39	6.33	5.98	6.33	10:00:00	11:56:00	14:06:00	01:56:00	02:10:00	116	130
719	28.05.19	35	Control	30	36.0	8	NA	C8	NA	6.34	6.12	6.49	10:01:00	11:57:00	14:07:00	01:56:00	02:10:00	116	130
721	28.05.19	35	Control	30	35.9	9	4	9	33	6.39	5.83	6.75	10:03:00	11:59:00	14:11:00	01:56:00	02:12:00	116	132
723	28.05.19	35	Control	30	35.9	9	NA	C9	NA	6.32	6.07	6.61	10:06:00	12:01:00	14:12:00	01:55:00	02:11:00	115	131
725	28.05.19	35	Medium	30	37.5	10	3	10	26	6.26	5.02	5.96	10:07:00	12:04:00	14:17:00	01:57:00	02:13:00	117	133
727	28.05.19	35	Medium	30	37.5	10	NA	C10	NA	6.15	5.82	5.98	10:09:00	12:06:00	14:18:00	01:57:00	02:12:00	117	132
729	28.05.19	35	High	30	37.1	11	7	11	40	6.18	5.46	5.80	10:12:00	12:07:00	14:21:00	01:55:00	02:14:00	115	134
731	28.05.19	35	High	30	37.1	11	NA	C11	NA	6.13	5.80	5.91	10:13:00	12:09:00	14:21:00	01:56:00	02:12:00	116	132
733	28.05.19	35	Low	30	37.2	12	9	12	35	6.28	5.68	6.04	10:15:00	12:11:00	14:25:00	01:56:00	02:14:00	116	134
735	28.05.19	35	Low	30	37.2	12	NA	C12	NA	6.17	6.02	6.32	10:17:00	12:13:00	14:26:00	01:56:00	02:13:00	116	133
737	28.05.19	35	ControlT	30	35.9	13	2	13	26	6.42	6.22	6.51	10:21:00	12:19:00	14:29:00	01:58:00	02:10:00	118	130
739	28.05.19	35	ControlT	30	35.9	13	NA	C13	NA	6.52	6.36	6.64	10:22:00	12:20:00	14:30:00	01:58:00	02:10:00	118	130
741	28.05.19	35	ControlT	30	35.4	14	2	14	41	6.52	5.98	6.32	10:23:00	12:22:00	14:32:00	01:59:00	02:10:00	119	130
743	28.05.19	35	ControlT	30	35.4	14	NA	C14	NA	6.57	6.35	6.58	10:25:00	12:25:00	14:34:00	02:00:00	02:09:00	120	129
745	28.05.19	35	ControlT	30	35.7	15	9	15	34	6.58	6.16	6.52	10:26:00	12:27:00	14:37:00	02:01:00	02:10:00	121	130
747	28.05.19	35	ControlT	30	35.7	15	NA	C15	NA	6.60	6.46	6.69	10:28:00	12:29:00	14:38:00	02:01:00	02:09:00	121	129
749	28.05.19	35	ControlT	30	35.6	16	3	16	17	6.69	6.11	6.77	10:29:00	12:31:00	14:40:00	02:02:00	02:09:00	122	129
751	28.05.19	35	ControlT	30	35.6	16	NA	C16	NA	6.48	6.30	6.67	10:30:00	12:32:00	14:41:00	02:02:00	02:09:00	122	129
753	29.05.19	36	Control	30	35.4	1	6	1	52	6.57	6.03	6.48	09:26:00	11:30:00	13:40:00	02:04:00	02:10:00	124	130
755	29.05.19	36	Control	30	35.4	1	NA	C1	NA	6.33	6.26	6.62	09:27:00	11:31:00	13:42:00	02:04:00	02:11:00	124	131
757	29.05.19	36	Medium	30	35.7	2	6	2	19	6.14	5.81	6.04	09:29:00	11:33:00	13:44:00	02:04:00	02:11:00	124	131
759	29.05.19	36	Medium	30	35.7	2	NA	C2	NA	6.06	5.88	5.81	09:31:00	11:34:00	13:46:00	02:03:00	02:12:00	123	132
761	29.05.19	36	High	30	35.0	3	3	3	28	6.09	5.67	5.76	09:33:00	11:36:00	13:50:00	02:03:00	02:14:00	123	134
763	29.05.19	36	High	30	35.0	3	NA	C3	NA	5.95	5.80	5.78	09:34:00	11:37:00	13:52:00	02:03:00	02:15:00	123	135
765	29.05.19	36	Low	30	36.1	4	7	4	62	6.23	5.08	5.83	09:35:00	11:40:00	13:56:00	02:05:00	02:16:00	125	136
767	29.05.19	36	Low	30	36.1	4	NA	C4	NA	6.07	5.90	6.05	09:36:00	11:42:00	13:57:00	02:06:00	02:15:00	126	135
769	29.05.19	36	High	30	35.9	5	1	5	33	6.10	5.29	5.76	09:38:00	11:45:00	14:01:00	02:07:00	02:16:00	127	136
771	29.05.19	36	High	30	35.9	5	NA	C5	NA	6.00	5.66	5.80	09:39:00	11:46:00	14:03:00	02:07:00	02:17:00	127	137
773	29.05.19	36	Medium	30	35.8	6	9	6	42	6.03	5.47	5.77	09:40:00	11:48:00	14:08:00	02:08:00	02:20:00	128	140
775	29.05.19	36	Medium	30	35.8	6	NA	C6	NA	5.99	5.69	5.82	09:42:00	11:50:00	14:09:00	02:08:00	02:19:00	128	139
777	29.05.19	36	Low	30	35.9	7	6	7	75	6.01	4.60	5.22	09:43:00	11:52:00	14:13:00	02:09:00	02:21:00	129	141
779	29.05.19	36	Low	30	35.9	7	NA	C7	NA	5.94	5.74	5.94	09:44:00	11:54:00	14:15:00	02:10:00	02:21:00	130	141
781	29.05.19	36	Control	30	36.1	8	10	8	40	6.25	5.94	6.38	09:46:00	11:56:00	14:20:00	02:10:00	02:24:00	130	144
783	29.05.19	36	Control	30	36.1	8	NA	C8	NA	6.22	6.07	6.45	09:48:00	11:57:00	14:21:00	02:09:00	02:24:00	129	144
785	29.05.19	36	Control	30	35.3	9	7	9	35	6.31	5.43	6.63	09:50:00	12:00:00	14:26:00	02:10:00	02:26:00	130	146
787	29.05.19	36	Control	30	35.3	9	NA	C9	NA	6.30	6.00	6.51	09:53:00	12:01:00	14:28:00	02:08:00	02:27:00	128	147
789	29.05.19	36	Medium	30	36.9	10	7	10	56	6.14	4.76	5.98	09:54:00	12:04:00	14:34:00	02:10:00	02:30:00	130	150
791	29.05.19	36	Medium	30	36.9	10	NA	C10	NA	6.08	5.77	5.99	09:55:00	12:06:00	14:35:00	02:11:00	02:29:00	131	149
793	29.05.19	36	High	30	36.6	11	4	11	19	6.06	5.61	5.75	09:57:00	12:09:00	14:42:00	02:12:00	02:33:00	132	153
795	29.05.19	36	High	30	36.6	11	NA	C11	NA	5.99	5.80	5.91	09:59:00	12:10:00	14:44:00	02:11:00	02:34:00	131	154
797	29.05.19	36	Low	30	36.6	12	2	12	52	6.11	4.84	5.52	10:00:00	12:13:00	14:47:00	02:13:00	02:34:00	133	154
799	29.05.19	36	Low	30	36.6	12	NA	C12	NA	6.20	5.89	6.13	10:01:00	12:15:00	14:48:00	02:14:00	02:33:00	134	153
801	29.05.19	36	ControlT	30	35.1	13	7	13	56	6.51	6.30	6.24	10:03:00	12:17:00	14:52:00	02:14:00	02:35:00	134	155
803	29.05.19	36	ControlT	30	35.1	13	NA	C13	NA	6.48	6.40	6.59	10:05:00	12:19:00	14:54:00	02:14:00	02:35:00	134	155
805	29.05.19	36	ControlT	30	34.7	14	10	14	51	6.62	6.00	6.19	10:08:00	12:21:00	15:04:00	02:13:00	02:43:00	133	163
807	29.05.19	36	ControlT	30	34.7	14	NA	C14	NA	6.68	6.36	6.81	10:09:00	12:23:00	15:06:00	02:14:00	02:43:00	134	163
809	29.05.19	36	ControlT	30	34.5	15	8	15	42	6.72	5.98	6.52	10:11:00	12:26:00	14:57:00	02:15:00	02:31:00	135	151
811	29.05.19	36	ControlT	30	34.5	15	NA	C15	NA	6.67	6.50	6.76	10:13:00	12:28:00	14:59:00	02:15:00	02:31:00	135	151
813	29.05.19	36	ControlT	30	35.6	16	9	16	23	6.65	6.19	6.63	10:15:00	12:30:00	15:10:00	02:15:00	02:40:00	135	160
815	29.05.19	36	ControlT	30	35.6	16	NA	C16	NA	5.01	6.31	6.77	10:16:00	12:31:00	15:11:00	02:15:00	02:40:00	135	160
817	30.05.19	37	Control	30	35.5	1	5	1	39	6.60	6.48	6.58	09:50:00	11:56:00	14:03:00	02:06:00	02:07:00	126	127
819	30.05.19	37	Control	30	35.5	1	NA	C1	NA	6.42	6.24	6.61	09:53:00	11:58:00	14:03:00	02:05:00	02:05:00	125	125
821	30.05.19	37	Medium	30	35.6	2	6	2	23	6.21	5.89	6.08	09:55:00	12:00:00	14:06:00	02:05:00	02:06:00	125	126
823	30.05.19	37	Medium	30	35.6	2	NA	C2	NA	6.05	5.97	5.92	09:57:00	12:02:00	14:07:00	02:05:00	02:05:00	125	125
825	30.05.19	37	High	30	35.1	3	10	3	78	6.15	5.43	5.10	09:59:00	12:04:00	14:09:00	02:05:00	02:05:00	125	125
827	30.05.19	37	High	30	35.1	3	NA	C3	NA	6.04	5.85	5.78	10:01:00	12:06:00	14:11:00	02:05:00	02:05:00	125	125
829	30.05.19	37	Low	30	36.0	4	10	4	12	6.44	6.05	6.08	10:03:00	12:09:00	14:12:00	02:06:00	02:03:00	126	123
831	30.05.19	37	Low	30	36.0	4	NA	C4	NA	6.33	6.10	6.08	10:05:00	12:10:00	14:13:00	02:05:00	02:03:00	125	123
833	30.05.19	37	High	30	36.2	5	5	5	31	6.27	5.75	5.63	10:06:00	12:12:00	14:17:00	02:06:00	02:05:00	126	125
835	30.05.19	37	High	30	36.2	5	NA	C5	NA	6.04	5.75	5.73	10:08:00	12:13:00	14:18:00	02:05:00	02:05:00	125	125
837	30.05.19	37	Medium	30	36.0	6	6	6	37	6.20	5.58	5.66	10:12:00	12:16:00	14:21:00	02:04:00	02:05:00	124	125
839	30.05.19	37	Medium	30	36.0	6	NA	C6	NA	6.06	5.76	5.69	10:14:00	12:18:00	14:24:00	02:04:00	02:06:00	124	126
841	30.05.19	37	Low	30	36.2	7	9	7	65	6.25	5.78	5.50	10:17:00	12:19:00	14:26:00	02:02:00	02:07:00	122	127
843	30.05.19	37	Low	30	36.2	7	NA	C7	NA	6.12	5.91	5.89	10:18:00	12:21:00	14:27:00	02:03:00	02:06:00	123	126
845	30.05.19	37	Control	30	36.3	8	8	8	31	6.43	6.02	6.49	10:20:00	12:29:00	14:28:00	02:09:00	01:59:00	129	119
847	30.05.19	37	Control	30	36.3	8	NA	C8	NA	6.22	6.07	6.35	10:22:00	12:31:00	14:30:00	02:09:00	01:59:00	129	119
849	30.05.19	37	Control	30	35.5	9	10	9	48	6.40	6.13	6.39	10:24:00	12:24:00	14:32:00	02:00:00	02:08:00	120	128
851	30.05.19	37	Control	30	35.5	9	NA	C9	NA	6.34	6.15	6.31	10:26:00	12:25:00	14:33:00	01:59:00	02:08:00	119	128
853	30.05.19	37	Medium	30	37.3	10	4	10	47	6.18	5.50	5.84	10:28:00	12:32:00	14:35:00	02:04:00	02:03:00	124	123
855	30.05.19	37	Medium	30	37.3	10	NA	C10	NA	6.07	5.82	5.85	10:30:00	12:33:00	14:36:00	02:03:00	02:03:00	123	123
857	30.05.19	37	High	30	36.9	11	7	11	45	6.19	5.60	5.58	10:32:00	12:36:00	14:37:00	02:04:00	02:01:00	124	121
859	30.05.19	37	High	30	36.9	11	NA	C11	NA	6.16	5.87	5.80	10:34:00	12:37:00	14:39:00	02:03:00	02:02:00	123	122
861	30.05.19	37	Low	30	36.8	12	9	12	36	6.27	5.90	6.02	10:38:00	12:39:00	14:40:00	02:01:00	02:01:00	121	121
863	30.05.19	37	Low	30	36.8	12	NA	C12	NA	6.19	6.03	6.06	10:39:00	12:41:00	14:41:00	02:02:00	02:00:00	122	120
865	30.05.19	37	ControlT	30	35.5	13	3	13	57	6.67	6.08	6.13	10:41:00	12:43:00	14:43:00	02:02:00	02:00:00	122	120
867	30.05.19	37	ControlT	30	35.5	13	NA	C13	NA	6.62	6.41	6.47	10:42:00	12:45:00	14:44:00	02:03:00	01:59:00	123	119
869	30.05.19	37	ControlT	30	34.8	14	2	14	42	6.73	6.41	6.35	10:45:00	12:47:00	14:45:00	02:02:00	01:58:00	122	118
871	30.05.19	37	ControlT	30	34.8	14	NA	C14	NA	6.69	6.61	6.51	10:46:00	12:49:00	14:46:00	02:03:00	01:57:00	123	117
873	30.05.19	37	ControlT	30	34.5	15	9	15	48	6.72	6.53	6.43	10:48:00	12:51:00	14:47:00	02:03:00	01:56:00	123	116
875	30.05.19	37	ControlT	30	34.5	15	NA	C15	NA	6.69	6.63	6.55	10:49:00	12:52:00	14:49:00	02:03:00	01:57:00	123	117
877	30.05.19	37	ControlT	30	36.5	16	10	16	24	6.77	6.36	6.38	10:51:00	12:56:00	14:50:00	02:05:00	01:54:00	125	114
879	30.05.19	37	ControlT	30	36.5	16	NA	C16	NA	6.62	6.43	6.49	10:52:00	12:57:00	14:50:00	02:05:00	01:53:00	125	113
881	05.06.19	43	Control	32	35.9	1	6	1	56	8.37	7.72	7.67	09:42:00	11:41:00	13:40:00	01:59:00	01:59:00	119	119
883	05.06.19	43	Control	32	35.9	1	NA	C1	NA	8.00	7.72	7.48	09:46:00	11:43:00	13:46:00	01:57:00	02:03:00	117	123
885	05.06.19	43	Medium	32	35.4	2	8	2	28	7.54	6.51	6.44	09:48:00	11:48:00	13:48:00	02:00:00	02:00:00	120	120
887	05.06.19	43	Medium	32	35.4	2	NA	C2	NA	7.25	6.93	6.59	09:49:00	11:49:00	13:50:00	02:00:00	02:01:00	120	121
889	05.06.19	43	High	32	35.6	3	4	3	60	7.29	6.06	5.92	09:51:00	11:51:00	13:53:00	02:00:00	02:02:00	120	122
891	05.06.19	43	High	32	35.6	3	NA	C3	NA	7.08	6.80	6.42	09:52:00	11:54:00	13:55:00	02:02:00	02:01:00	122	121
893	05.06.19	43	Low	32	36.1	4	7	4	85	7.44	6.50	6.58	09:54:00	11:56:00	13:57:00	02:02:00	02:01:00	122	121
895	05.06.19	43	Low	32	36.1	4	NA	C4	NA	7.33	7.13	6.89	09:55:00	11:59:00	13:59:00	02:04:00	02:00:00	124	120
897	05.06.19	43	High	32	35.8	5	5	5	33	7.38	7.48	6.54	09:58:00	12:00:00	14:01:00	02:02:00	02:01:00	122	121
899	05.06.19	43	High	32	35.8	5	NA	C5	NA	7.34	7.26	6.68	09:58:00	12:01:00	14:03:00	02:03:00	02:02:00	123	122
901	05.06.19	43	Medium	32	36.3	6	1	6	43	7.58	6.56	6.47	10:00:00	12:03:00	14:05:00	02:03:00	02:02:00	123	122
903	05.06.19	43	Medium	32	36.3	6	NA	C6	NA	7.46	7.00	6.73	10:01:00	12:06:00	14:07:00	02:05:00	02:01:00	125	121
905	05.06.19	43	Low	32	36.3	7	7	7	65	7.44	5.85	6.06	10:02:00	12:07:00	14:09:00	02:05:00	02:02:00	125	122
907	05.06.19	43	Low	32	36.3	7	NA	C7	NA	7.41	6.95	6.90	10:03:00	12:12:00	14:11:00	02:09:00	01:59:00	129	119
909	05.06.19	43	Control	32	36.0	8	5	8	27	7.63	6.95	7.32	10:05:00	12:13:00	14:13:00	02:08:00	02:00:00	128	120
911	05.06.19	43	Control	32	36.0	8	NA	C8	NA	7.68	7.40	7.43	10:06:00	12:15:00	14:15:00	02:09:00	02:00:00	129	120
913	05.06.19	43	Control	32	36.5	9	7	9	30	8.40	6.67	6.67	10:12:00	12:16:00	14:17:00	02:04:00	02:01:00	124	121
915	05.06.19	43	Control	32	36.5	9	NA	C9	NA	8.06	7.22	7.35	10:13:00	12:19:00	14:19:00	02:06:00	02:00:00	126	120
917	05.06.19	43	Medium	32	38.6	10	3	10	35	7.86	6.63	6.18	10:14:00	12:20:00	14:22:00	02:06:00	02:02:00	126	122
919	05.06.19	43	Medium	32	38.6	10	NA	C10	NA	7.62	6.97	6.66	10:15:00	12:22:00	14:25:00	02:07:00	02:03:00	127	123
921	05.06.19	43	High	32	37.2	11	1	11	25	7.71	6.73	6.32	10:18:00	12:23:00	14:28:00	02:05:00	02:05:00	125	125
923	05.06.19	43	High	32	37.2	11	NA	C11	NA	7.64	7.05	6.70	10:19:00	12:25:00	14:30:00	02:06:00	02:05:00	126	125
925	05.06.19	43	Low	32	37.0	12	2	12	61	7.84	6.39	6.43	10:21:00	12:27:00	14:33:00	02:06:00	02:06:00	126	126
927	05.06.19	43	Low	32	37.0	12	NA	C12	NA	7.69	7.08	6.92	10:22:00	12:29:00	14:35:00	02:07:00	02:06:00	127	126
929	05.06.19	43	ControlT	32	33.7	13	2	13	32	7.85	7.85	7.72	10:24:00	12:31:00	14:38:00	02:07:00	02:07:00	127	127
931	05.06.19	43	ControlT	32	33.7	13	NA	C13	NA	7.92	8.00	7.89	10:26:00	12:33:00	14:40:00	02:07:00	02:07:00	127	127
933	05.06.19	43	ControlT	32	34.7	14	10	14	63	7.92	7.14	7.01	10:27:00	12:34:00	14:42:00	02:07:00	02:08:00	127	128
935	05.06.19	43	ControlT	32	34.7	14	NA	C14	NA	7.98	7.91	7.77	10:28:00	12:37:00	14:44:00	02:09:00	02:07:00	129	127
937	05.06.19	43	ControlT	32	34.7	15	8	15	49	8.00	7.39	7.48	10:29:00	12:38:00	14:48:00	02:09:00	02:10:00	129	130
939	05.06.19	43	ControlT	32	34.7	15	NA	C15	NA	8.03	7.74	7.86	10:30:00	12:41:00	14:50:00	02:11:00	02:09:00	131	129
941	05.06.19	43	ControlT	32	34.7	16	8	16	22	8.00	7.70	7.75	10:31:00	12:42:00	14:52:00	02:11:00	02:10:00	131	130
943	05.06.19	43	ControlT	32	34.7	16	NA	C16	NA	8.01	7.95	7.86	10:32:00	12:43:00	14:53:00	02:11:00	02:10:00	131	130
945	06.06.19	44	Control	32	36.4	1	4	1	24	7.90	7.26	7.58	09:51:00	12:01:00	14:03:00	02:10:00	02:02:00	130	122
947	06.06.19	44	Control	32	36.4	1	NA	C1	NA	7.70	7.38	7.51	09:53:00	12:02:00	14:06:00	02:09:00	02:04:00	129	124
949	06.06.19	44	Medium	32	36.0	2	7	2	39	7.08	5.91	5.98	09:53:00	12:02:00	14:08:00	02:09:00	02:06:00	129	126
951	06.06.19	44	Medium	32	36.0	2	NA	C2	NA	6.92	6.47	6.36	09:55:00	12:06:00	14:10:00	02:11:00	02:04:00	131	124
953	06.06.19	44	High	32	36.1	3	10	3	84	6.87	4.82	4.80	09:56:00	12:07:00	14:11:00	02:11:00	02:04:00	131	124
955	06.06.19	44	High	32	36.1	3	NA	C3	NA	6.79	6.15	5.89	09:57:00	12:10:00	14:16:00	02:13:00	02:06:00	133	126
957	06.06.19	44	Low	32	36.6	4	4	4	87	7.15	5.16	5.58	09:58:00	12:12:00	14:17:00	02:14:00	02:05:00	134	125
959	06.06.19	44	Low	32	36.6	4	NA	C4	NA	7.20	6.80	6.64	09:59:00	12:13:00	14:21:00	02:14:00	02:08:00	134	128
961	06.06.19	44	High	32	36.2	5	5	5	34	7.23	6.58	6.60	10:00:00	12:15:00	14:22:00	02:15:00	02:07:00	135	127
963	06.06.19	44	High	32	36.2	5	NA	C5	NA	7.11	6.77	6.43	10:01:00	12:16:00	14:23:00	02:15:00	02:07:00	135	127
965	06.06.19	44	Medium	32	36.6	6	3	6	34	7.20	6.21	6.37	10:02:00	12:17:00	14:25:00	02:15:00	02:08:00	135	128
967	06.06.19	44	Medium	32	36.6	6	NA	C6	NA	7.13	6.72	6.80	10:03:00	12:19:00	14:26:00	02:16:00	02:07:00	136	127
969	06.06.19	44	Low	32	36.7	7	2	7	37	7.17	6.33	6.43	10:04:00	12:20:00	14:28:00	02:16:00	02:08:00	136	128
971	06.06.19	44	Low	32	36.7	7	NA	C7	NA	7.10	6.76	6.51	10:06:00	12:22:00	14:29:00	02:16:00	02:07:00	136	127
973	06.06.19	44	Control	32	36.4	8	9	8	32	7.31	6.97	6.87	10:07:00	12:23:00	14:32:00	02:16:00	02:09:00	136	129
975	06.06.19	44	Control	32	36.4	8	NA	C8	NA	7.41	7.16	7.19	10:08:00	12:25:00	14:33:00	02:17:00	02:08:00	137	128
977	06.06.19	44	Control	32	37.0	9	10	9	47	7.59	6.40	6.02	10:09:00	12:26:00	14:36:00	02:17:00	02:10:00	137	130
979	06.06.19	44	Control	32	37.0	9	NA	C9	NA	7.37	6.99	7.21	10:10:00	12:28:00	14:38:00	02:18:00	02:10:00	138	130
981	06.06.19	44	Medium	32	38.0	10	10	10	51	7.23	5.77	5.41	10:11:00	12:29:00	14:40:00	02:18:00	02:11:00	138	131
983	06.06.19	44	Medium	32	38.0	10	NA	C10	NA	7.11	6.64	6.37	10:13:00	12:31:00	14:43:00	02:18:00	02:12:00	138	132
985	06.06.19	44	High	32	37.7	11	3	11	27	7.14	6.43	6.06	10:14:00	12:32:00	14:45:00	02:18:00	02:13:00	138	133
987	06.06.19	44	High	32	37.7	11	NA	C11	NA	7.09	6.64	6.32	10:16:00	12:34:00	14:46:00	02:18:00	02:12:00	138	132
989	06.06.19	44	Low	32	37.7	12	5	12	60	7.26	6.04	6.25	10:17:00	12:35:00	14:48:00	02:18:00	02:13:00	138	133
991	06.06.19	44	Low	32	37.7	12	NA	C12	NA	7.23	6.81	6.65	10:18:00	12:37:00	14:50:00	02:19:00	02:13:00	139	133
993	06.06.19	44	ControlT	32	34.3	13	3	13	65	7.83	6.66	7.17	10:20:00	12:38:00	14:52:00	02:18:00	02:14:00	138	134
995	06.06.19	44	ControlT	32	34.3	13	NA	C13	NA	7.95	7.71	7.92	10:22:00	12:41:00	14:55:00	02:19:00	02:14:00	139	134
997	06.06.19	44	ControlT	32	35.2	14	10	14	59	8.01	7.04	7.58	10:23:00	12:42:00	14:56:00	02:19:00	02:14:00	139	134
999	06.06.19	44	ControlT	32	35.2	14	NA	C14	NA	8.00	7.58	8.02	10:24:00	12:44:00	14:58:00	02:20:00	02:14:00	140	134
1001	06.06.19	44	ControlT	32	35.2	15	8	15	51	7.98	6.77	7.77	10:24:00	12:46:00	14:59:00	02:22:00	02:13:00	142	133
1003	06.06.19	44	ControlT	32	35.2	15	NA	C15	NA	8.03	7.78	7.83	10:28:00	12:49:00	15:00:00	02:21:00	02:11:00	141	131
1005	06.06.19	44	ControlT	32	35.3	16	1	16	25	8.04	7.31	7.66	10:29:00	12:50:00	15:02:00	02:21:00	02:12:00	141	132
1007	06.06.19	44	ControlT	32	35.3	16	NA	C16	NA	7.95	7.70	7.93	10:31:00	12:51:00	15:05:00	02:20:00	02:14:00	140	134
1009	07.06.19	45	Control	32	34.3	1	8	1	51	7.51	6.34	7.09	08:56:00	11:10:00	13:34:00	02:14:00	02:24:00	134	144
1011	07.06.19	45	Control	32	34.3	1	NA	C1	NA	7.28	7.10	7.38	08:57:00	11:12:00	13:36:00	02:15:00	02:24:00	135	144
1013	07.06.19	45	Medium	32	34.0	2	10	2	61	7.02	5.56	6.15	08:59:00	11:13:00	13:42:00	02:14:00	02:29:00	134	149
1015	07.06.19	45	Medium	32	34.0	2	NA	C2	NA	6.84	6.60	6.43	09:00:00	11:17:00	13:44:00	02:17:00	02:27:00	137	147
1017	07.06.19	45	High	32	34.2	3	5	3	56	6.96	5.68	6.09	09:03:00	11:19:00	13:47:00	02:16:00	02:28:00	136	148
1019	07.06.19	45	High	32	34.2	3	NA	C3	NA	6.69	6.33	6.04	09:05:00	11:22:00	13:51:00	02:17:00	02:29:00	137	149
1021	07.06.19	45	Low	32	34.7	4	3	4	36	7.11	6.57	6.86	09:06:00	11:24:00	13:54:00	02:18:00	02:30:00	138	150
1023	07.06.19	45	Low	32	34.7	4	NA	C4	NA	7.13	6.98	6.96	09:07:00	11:27:00	13:56:00	02:20:00	02:29:00	140	149
1025	07.06.19	45	High	32	34.3	5	1	5	39	7.28	6.44	6.41	09:14:00	11:29:00	13:58:00	02:15:00	02:29:00	135	149
1027	07.06.19	45	High	32	34.3	5	NA	C5	NA	7.03	6.82	6.66	09:21:00	11:32:00	14:01:00	02:11:00	02:29:00	131	149
1029	07.06.19	45	Medium	32	34.8	6	1	6	40	7.10	6.24	6.42	09:22:00	11:34:00	14:04:00	02:12:00	02:30:00	132	150
1031	07.06.19	45	Medium	32	34.8	6	NA	C6	NA	7.03	6.79	6.75	09:22:00	11:37:00	14:06:00	02:15:00	02:29:00	135	149
1033	07.06.19	45	Low	32	34.8	7	9	7	68	7.21	5.53	6.22	09:32:00	11:39:00	14:11:00	02:07:00	02:32:00	127	152
1035	07.06.19	45	Low	32	34.8	7	NA	C7	NA	7.03	6.83	6.93	09:34:00	11:42:00	14:15:00	02:08:00	02:33:00	128	153
1037	07.06.19	45	Control	32	34.6	8	8	8	30	7.34	6.68	7.21	09:34:00	11:45:00	14:18:00	02:11:00	02:33:00	131	153
1039	07.06.19	45	Control	32	34.6	8	NA	C8	NA	7.34	7.22	7.61	09:35:00	11:47:00	14:19:00	02:12:00	02:32:00	132	152
1041	07.06.19	45	Control	32	35.1	9	1	9	31	7.69	6.92	7.52	09:48:00	11:50:00	14:23:00	02:02:00	02:33:00	122	153
1043	07.06.19	45	Control	32	35.1	9	NA	C9	NA	7.37	7.14	7.55	09:50:00	11:54:00	14:24:00	02:04:00	02:30:00	124	150
1045	07.06.19	45	Medium	32	36.4	10	7	10	29	7.34	6.38	5.87	09:50:00	11:56:00	14:28:00	02:06:00	02:32:00	126	152
1047	07.06.19	45	Medium	32	36.4	10	NA	C10	NA	7.06	6.73	6.37	09:52:00	11:59:00	14:31:00	02:07:00	02:32:00	127	152
1049	07.06.19	45	High	32	35.3	11	8	11	18	7.26	6.81	5.82	10:17:00	12:01:00	14:39:00	01:44:00	02:38:00	104	158
1051	07.06.19	45	High	32	35.3	11	NA	C11	NA	6.89	6.79	6.41	10:18:00	12:27:00	14:41:00	02:09:00	02:14:00	129	134
1053	07.06.19	45	Low	32	35.4	12	4	12	44	7.29	6.52	6.57	10:19:00	12:32:00	14:43:00	02:13:00	02:11:00	133	131
1055	07.06.19	45	Low	32	35.4	12	NA	C12	NA	7.07	7.05	6.79	10:20:00	12:34:00	14:43:00	02:14:00	02:09:00	134	129
1057	07.06.19	45	ControlT	32	33.3	13	7	13	51	8.51	7.57	7.77	10:34:00	12:40:00	14:47:00	02:06:00	02:07:00	126	127
1059	07.06.19	45	ControlT	32	33.3	13	NA	C13	NA	8.62	8.20	8.22	10:38:00	12:43:00	14:49:00	02:05:00	02:06:00	125	126
1061	07.06.19	45	ControlT	32	34.5	14	2	14	45	8.10	7.64	7.79	10:39:00	12:48:00	14:51:00	02:09:00	02:03:00	129	123
1063	07.06.19	45	ControlT	32	34.5	14	NA	C14	NA	8.34	8.08	8.21	10:40:00	12:50:00	14:52:00	02:10:00	02:02:00	130	122
1065	07.06.19	45	ControlT	32	34.7	15	3	15	41	8.44	7.72	7.38	10:54:00	12:55:00	14:53:00	02:01:00	01:58:00	121	118
1067	07.06.19	45	ControlT	32	34.7	15	NA	C15	NA	8.37	8.01	8.17	10:54:00	12:58:00	14:54:00	02:04:00	01:56:00	124	116
1069	07.06.19	45	ControlT	32	34.8	16	7	16	55	8.32	7.38	7.77	10:55:00	13:03:00	14:56:00	02:08:00	01:53:00	128	113
1071	07.06.19	45	ControlT	32	34.8	16	NA	C16	NA	8.29	8.00	8.12	10:56:00	13:04:00	14:57:00	02:08:00	01:53:00	128	113
