# Supplementary material for: Photosynthesis and respiration of the soft coral Xenia umbellata respond to warming but not to organic carbon eutrophication
Source: PeerJ. 2021 Jul 27;9:e11663. doi: 10.7717/peerj.11663 (PMC8323596; doi:10.7717/peerj.11663)
Supplement: Supplemental Information 3 [file peerj-09-11663-s003.xlsx]

## Sheet: Sheet1
date	day	treatment	temperature	tank_ID	surviving	bleached	paler	Notes
23.04.19	-1	Control	26	1	10	0	0
23.04.19	-1	Medium	26	2	10	0	0
23.04.19	-1	High	26	3	10	0	0
23.04.19	-1	Low	26	4	10	0	0
23.04.19	-1	High	26	5	10	0	0
23.04.19	-1	Medium	26	6	10	0	0
23.04.19	-1	Low	26	7	10	0	0
23.04.19	-1	Control	26	8	10	0	0
23.04.19	-1	Control	26	9	10	0	0
23.04.19	-1	Medium	26	10	10	0	0
23.04.19	-1	High	26	11	10	0	0
23.04.19	-1	Low	26	12	10	0	0
14.05.19	21	Control	26	1	10	0	0
14.05.19	21	Medium	26	2	10	0	0
14.05.19	21	High	26	3	10	0	0
14.05.19	21	Low	26	4	10	0	0
14.05.19	21	High	26	5	10	0	0
14.05.19	21	Medium	26	6	10	0	0
14.05.19	21	Low	26	7	10	0	0
14.05.19	21	Control	26	8	10	0	0
14.05.19	21	Control	26	9	10	0	0
14.05.19	21	Medium	26	10	10	0	0
14.05.19	21	High	26	11	10	0	0
14.05.19	21	Low	26	12	10	0	0
14.05.19	21	ControlT	26	13	10	0	0
14.05.19	21	ControlT	26	14	10	0	0
14.05.19	21	ControlT	26	15	10	0	0
14.05.19	21	ControlT	26	16	10	0	0
21.05.19	28	Control	28	1	10	0	0
21.05.19	28	Medium	28	2	10	0	0
21.05.19	28	High	28	3	10	0	0
21.05.19	28	Low	28	4	10	0	0
21.05.19	28	High	28	5	10	0	0
21.05.19	28	Medium	28	6	10	0	0
21.05.19	28	Low	28	7	10	0	0
21.05.19	28	Control	28	8	10	0	0
21.05.19	28	Control	28	9	10	0	0
21.05.19	28	Medium	28	10	10	0	0
21.05.19	28	High	28	11	10	0	0
21.05.19	28	Low	28	12	10	0	0
21.05.19	28	ControlT	28	13	10	0	0
21.05.19	28	ControlT	28	14	10	0	0
21.05.19	28	ControlT	28	15	10	0	0
21.05.19	28	ControlT	28	16	10	0	0	1 Colony Sacrificed from each tank for further studies
29.05.19	36	Control	30	1	9	0	0
29.05.19	36	Medium	30	2	9	0	0
29.05.19	36	High	30	3	9	0	0
29.05.19	36	Low	30	4	9	0	0
29.05.19	36	High	30	5	9	0	1
29.05.19	36	Medium	30	6	9	0	0
29.05.19	36	Low	30	7	9	0	0
29.05.19	36	Control	30	8	9	0	0
29.05.19	36	Control	30	9	9	0	0
29.05.19	36	Medium	30	10	9	0	3
29.05.19	36	High	30	11	9	0	4
29.05.19	36	Low	30	12	9	0	0
29.05.19	36	ControlT	30	13	9	0	0
29.05.19	36	ControlT	30	14	9	0	0
29.05.19	36	ControlT	30	15	9	0	0
29.05.19	36	ControlT	30	16	9	0	0	1 Colony Sacrificed from each tank for further studies
07.06.19	45	Control	32	1	7	0	0
07.06.19	45	Medium	32	2	8	0	0
07.06.19	45	High	32	3	8	0	0
07.06.19	45	Low	32	4	8	0	0
07.06.19	45	High	32	5	8	0	3
07.06.19	45	Medium	32	6	7	0	1	1 Colony lost
07.06.19	45	Low	32	7	8	0	0
07.06.19	45	Control	32	8	6	0	0
07.06.19	45	Control	32	9	7	0	0
07.06.19	45	Medium	32	10	8	0	4
07.06.19	45	High	32	11	8	0	6
07.06.19	45	Low	32	12	8	0	0
07.06.19	45	ControlT	32	13	8	0	0
07.06.19	45	ControlT	32	14	8	0	0
07.06.19	45	ControlT	32	15	8	0	0
07.06.19	45	ControlT	32	16	8	0	0	1 Colony Sacrificed from each tank for further studies
